# Supplementary material for: Molecular Evolutionary Analysis of Nematode Zona Pellucida (ZP) Modules Reveals Disulfide-Bond Reshuffling and Standalone ZP-C Domains
Source: PubMed Central journal article supplement (PMC7456536; doi:10.1093/gbe/evaa095), 2020-05-19

Supplementary Material for:

*Molecular evolutionary analysis of nematode Zona Pellucida (ZP) modules reveals disulfide-bond reshuffling and standalone ZP-C domains*

### Supplementary Files

- Available via the Dryad Digital Repository
  - <https://datadryad.org/stash/dataset/doi:10.5061/dryad.q2bvq83g9>
  - Weadick, CJ (2020). Data from: Molecular evolutionary analysis of nematode Zona Pellucida (ZP) modules reveals disulfide-bond reshuffling and standalone ZP-C domains, Dryad, Dataset, <https://doi.org/10.5061/dryad.q2bvq83g9>
- 1. Preliminary *C. elegans* ZP module alignment
- 2. Sequence data table
- 3. Alignment data table
- 4. Nematode ZP module focal alignment
- 5. ZP module phylogenies
- 6. *C. elegans* ZP homology models and structural alignments

### Supplementary Tables

1. *C. elegans* ZPD proteins
2. Data set sources
3. Phylogeny-based versus sequence-based classification of nematode ZP modules
4. Codon model analysis of standalone ZP-C domain subfamilies
5. RaptorX homology modelling results

### Supplementary Figures

1. Positional map between trimmed and untrimmed versions of *C. elegans* CUT-1
2. Branch support metrics for the majority rule consensus tree
3. Branch support metrics for the focal alignment's maximum likelihood tree
4. Variable amino acid conservation patterns among nematode ZP modules
5. Minimal Ancestor Deviation (MAD) rooting of the nematode ZP module tree
6. Phylogenetic distribution of ZP modules across the major nematode clades
7. Phylogenetic distribution of nematode ZPD protein domain architecture
8. Selective constraint profiles for standalone ZP-C proteins
9. Conserved disulfide connectivity patterns in nematode ZP-N domains
10. Variable disulfide connectivity patterns in nematode ZP-C domains

## Supplementary Files

Supplementary File 1: Preliminary *C. elegans* ZP module alignment. A preliminary alignment of *C. elegans* ZPD proteins was generated using GISMO (Neuwald & Altschul 2016 *PLoS Comp Biol* vol. 12) in order to isolate the ZP modules. The top-scoring alignment (highest LLR score) out of five replicates is provided here in GISMO .cma format (obtained using random seed 28270). For each entry, the sequence data within the two sets of parentheses indicate the upstream and downstream flanks. For the data between these two regions, uppercase letters and dashes indicate the homologous core, while lowercase letters indicate insertions within the core.

Supplementary File 2: Sequence data table. A .csv format table providing relevant data for each of the 1783 nematode ZPD protein sequences included in the final data set. Columns indicate: (1) sequence name; (2) species; (3) taxonomic clade (Blaxter et al 1998 *Nature* vol. 392); (4) predicted signal peptide (Y/N); (5) predicted R/K cleavage sites, excluding any predicted within the signal peptide (Y/N); (6) predicted GPI anchor (Y/N); (7) ZP-N domain gap proportion (averaged across alignment replicates); (8) ZP-C domain gap proportion (averaged across alignment replicates); (9) Predicted Pfam domains (significant hits only).

Supplementary File 3: Alignment data table. A .csv format table providing relevant data for each of the 100 replicate alignments estimated for the final data set of 1783 nematode ZP modules. Columns indicate: (1) replicate number; (2) GISMO random seed; (3) length of trimmed alignment (in amino acids); (4) LLR for trimmed alignment; (5) selected substitution model; (6) AIC weight for substitution model; (7) PhyML random seed; (8) ML phylogeny log-likelihood.

Supplementary File 4: Nematode ZP module focal alignment. The top-scoring alignment (i.e., the replicate with the highest LLR score; replicate #38), shown in GISMO .cma format (Neuwald & Altschul 2016 *PLoS Comp Biol* vol. 12). For each entry, the sequence data within the two sets of parentheses indicate the upstream and downstream flanks. For the data between these two regions, uppercase letters and dashes indicate the conserved core, while lowercase letters indicate insertions within the core.

Supplementary File 5: ZP module phylogenies. Trees 1 and 2: majority-rule consensus topology with branch lengths estimated using the alignment with the highest LLR score; support values on tree 1 indicate Branch Recovery Proportions (BRPs), while those on tree 2 indicate Transfer Bootstrap Expectations (TBEs). Trees 3 and 4: the ML topology and branch lengths estimated using the alignment with the highest LLR score (with BRP and TBE support values, respectively). Trees 5–104: ML topologies and branch lengths estimated using the 100 replicate alignments, with aLRT SH-like support values. Alignment replicate #38 received the highest LLR score (=tree #42). All trees are provided in Newick (.nwk) format.

Supplementary File 6: *C. elegans* ZP homology models and structural alignments. Compressed archive (.tar.gz format) containing ZP homology models (.pdb format) and model-template sequence alignments (.fasta format) for *C. elegans* ZPD proteins, using human uromodulin (PDB 4wrnA) as the template. Homology models were generated using RaptorX (Kallberg et al 2012 *Nat Protoc* vol 7). Also included are structural alignments of the models (.pdb format), focussed either on the ZP-N domain (prefix = “zpn1\_”) or on the ZP-C domain (prefix = “zpc1\_”), along with associated input and output files.

## Supplementary Tables

Supplementary Table 1: *C. elegans* ZPD proteins.

| Protein  | Number of Isoforms | Length (aa) <sup>a</sup> | Upstream Domains <sup>b</sup> | Signal Peptide <sup>c</sup> | R/K Cleavage Sites <sup>c,d</sup> | GPI Anchor <sup>e</sup> |
|----------|--------------------|--------------------------|-------------------------------|-----------------------------|-----------------------------------|-------------------------|
| CUT-1    | 1                  | 424                      | —                             | Y                           | Y                                 | N                       |
| CUT-3    | 1                  | 389                      | —                             | Y                           | N                                 | N                       |
| CUT-4    | 1                  | 507                      | —                             | Y                           | N                                 | N                       |
| CUT-5b   | 2                  | 379                      | —                             | Y                           | Y                                 | N                       |
| CUT-6    | 1                  | 572                      | vWFA                          | Y                           | N                                 | N                       |
| CUTL-1   | 1                  | 399                      | —                             | N                           | Y                                 | N                       |
| CUTL-2   | 1                  | 382                      | —                             | Y                           | Y                                 | N                       |
| CUTL-3   | 1                  | 405                      | —                             | Y                           | Y                                 | N                       |
| CUTL-4   | 1                  | 469                      | —                             | Y                           | N                                 | N                       |
| CUTL-5   | 1                  | 437                      | —                             | Y                           | Y                                 | N                       |
| CUTL-6   | 1                  | 374                      | —                             | Y                           | Y                                 | N                       |
| CUTL-7   | 1                  | 585                      | —                             | Y                           | N                                 | N                       |
| CUTL-8a  | 2                  | 625                      | —                             | Y                           | N                                 | N                       |
| CUTL-9   | 1                  | 562                      | —                             | Y                           | Y                                 | N                       |
| CUTL-10  | 1                  | 403                      | —                             | Y                           | Y                                 | N                       |
| CUTL-11  | 1                  | 384                      | —                             | Y                           | N                                 | N                       |
| CUTL-12a | 3                  | 569                      | —                             | Y                           | Y                                 | N                       |
| CUTL-13  | 1                  | 445                      | —                             | Y                           | Y                                 | N                       |
| CUTL-14  | 1                  | 270                      | —                             | Y                           | N                                 | N                       |
| CUTL-15  | 1                  | 385                      | —                             | Y                           | Y                                 | N                       |
| CUTL-16  | 1                  | 488                      | —                             | Y                           | N                                 | N                       |
| CUTL-17  | 1                  | 912                      | PAN (x3)                      | Y                           | Y                                 | N                       |
| CUTL-18  | 1                  | 801                      | PAN (x4)                      | Y                           | Y                                 | N                       |
| CUTL-19b | 2                  | 237                      | —                             | Y                           | N                                 | Y                       |
| CUTL-20a | 2                  | 360                      | —                             | Y                           | Y                                 | Y                       |
| CUTL-22a | 3                  | 445                      | —                             | Y                           | N                                 | N                       |
| CUTL-23a | 2                  | 773                      | vWFA                          | Y                           | Y                                 | N                       |
| CUTL-24b | 2                  | 601                      | —                             | Y                           | Y                                 | N                       |
| CUTL-25  | 1                  | 385                      | —                             | Y                           | Y                                 | N                       |
| CUTL-26b | 2                  | 502                      | —                             | Y                           | N                                 | N                       |
| CUTL-27  | 1                  | 969                      | PAN (x5)                      | Y                           | Y                                 | N                       |
| CUTL-28  | 1                  | 696                      | PAN (x3)                      | Y                           | N                                 | N                       |

|                 |    |      |                |   |   |   |
|-----------------|----|------|----------------|---|---|---|
| <b>CUTL-29</b>  | 1  | 390  | —              | Y | Y | N |
| <b>DPY-1a</b>   | 2  | 1387 | vWFA           | Y | N | N |
| <b>DYF-7</b>    | 1  | 446  | —              | Y | Y | N |
| <b>F46G11.6</b> | 1  | 160  | —              | Y | N | N |
| <b>FBN-1a</b>   | 10 | 2779 | EGF-like (x31) | Y | Y | N |
| <b>LET-653b</b> | 3  | 653  | PAN (x2)       | Y | N | N |
| <b>NOAH-1c</b>  | 3  | 1052 | PAN (x6)       | Y | Y | N |
| <b>NOAH-2</b>   | 1  | 741  | PAN (x4)       | Y | Y | N |
| <b>RAM-5</b>    | 1  | 711  | —              | Y | N | N |
| <b>T01D1.8b</b> | 2  | 189  | —              | Y | N | N |
| <b>T23F1.5</b>  | 1  | 1262 | —              | Y | Y | Y |

**Notes**

- a - Length of the selected isoform.
- b - According to the protein's entry on <http://www.WormBase.org>.
- c - Predicted using Prop 1.0 (<http://www.cbs.dtu.dk/services/Prop/>).
- d - Ignoring any cleavage sites predicted within the signal peptide.
- e - Predicted using PredGPI (<http://gpcr.biocomp.unibo.it/predgpi/>).



## Supplementary Materials

**Supplementary Table 2.** Data set sources. Whole-genome predicted protein sequence data sets (and corresponding coding sequence data sets) were obtained for 59 nematode species from the specified data sources (and corresponding URLs). ‘Clade’ refers to the species’ phylogenetic grouping according to the 5-clade framework of Blaxter et al. (1998 *Nature* vol. 392). ‘# Proteins’ refers to the total number of entries in the predicted protein set; ‘# modules’ refers to the number of sequences included in the final ZP module data set after filtering out annotated isoforms.

| Species                           | Clade | Data Source                                                | URL                                                                                                                                                 | Identifier  | Assembly Name                    | # Proteins | # Modules |
|-----------------------------------|-------|------------------------------------------------------------|-----------------------------------------------------------------------------------------------------------------------------------------------------|-------------|----------------------------------|------------|-----------|
| <i>Ancylostoma ceylanicum</i>     | V     | parasite.wormbase.org                                      | <a href="ftp://ftp.ebi.ac.uk/pub/databases/wormbase/parasite/releases/WBPS9">ftp://ftp.ebi.ac.uk/pub/databases/wormbase/parasite/releases/WBPS9</a> | PRJNA231479 | Acey_2013.11.30.genDNA           | 65583      | 38        |
| <i>Brugia malayi</i>              | III   | wormbase.org                                               | <a href="ftp://ftp.wormbase.org/pub/wormbase/releases/WS259">ftp://ftp.wormbase.org/pub/wormbase/releases/WS259</a>                                 | PRJNA10729  | Bmal-4.0                         | 13436      | 36        |
| <i>Bursaphelenchus xylophilus</i> | IV    | parasite.wormbase.org                                      | <a href="ftp://ftp.ebi.ac.uk/pub/databases/wormbase/parasite/releases/WBPS9">ftp://ftp.ebi.ac.uk/pub/databases/wormbase/parasite/releases/WBPS9</a> | PRJEA64437  | ASM23113v1_submitted             | 17704      | 40        |
| <i>Caenorhabditis angaria</i>     | V     | wormbase.org                                               | <a href="ftp://ftp.wormbase.org/pub/wormbase/releases/WS259">ftp://ftp.wormbase.org/pub/wormbase/releases/WS259</a>                                 | PRJNA51225  | ps1010rel8                       | 33934      | 23        |
| <i>Caenorhabditis brenneri</i>    | V     | wormbase.org                                               | <a href="ftp://ftp.wormbase.org/pub/wormbase/releases/WS259">ftp://ftp.wormbase.org/pub/wormbase/releases/WS259</a>                                 | PRJNA20035  | C_brenneri-6.0.1b                | 30672      | 41        |
| <i>Caenorhabditis briggsae</i>    | V     | wormbase.org                                               | <a href="ftp://ftp.wormbase.org/pub/wormbase/releases/WS259">ftp://ftp.wormbase.org/pub/wormbase/releases/WS259</a>                                 | PRJNA10731  | CB4                              | 25387      | 54        |
| <i>Caenorhabditis elegans</i>     | V     | wormbase.org                                               | <a href="ftp://ftp.wormbase.org/pub/wormbase/releases/WS259">ftp://ftp.wormbase.org/pub/wormbase/releases/WS259</a>                                 | PRJNA13758  | WBcel235                         | 28197      | 43        |
| <i>Caenorhabditis japonica</i>    | V     | wormbase.org                                               | <a href="ftp://ftp.wormbase.org/pub/wormbase/releases/WS259">ftp://ftp.wormbase.org/pub/wormbase/releases/WS259</a>                                 | PRJNA12591  | C_japonica-7.0.1                 | 35976      | 36        |
| <i>Caenorhabditis monodelphis</i> | V     | <a href="http://caenorhabditis.org">caenorhabditis.org</a> | <a href="http://download.caenorhabditis.org/v1/sequence/">http://download.caenorhabditis.org/v1/sequence/</a>                                       | JU1667_v1   | v1                               | 21645      | 45        |
| <i>Caenorhabditis remanei</i>     | V     | wormbase.org                                               | <a href="ftp://ftp.wormbase.org/pub/wormbase/releases/WS259">ftp://ftp.wormbase.org/pub/wormbase/releases/WS259</a>                                 | PRJNA53967  | C_remanei-15.0.1                 | 31450      | 44        |
| <i>Caenorhabditis sinica</i>      | V     | wormbase.org                                               | <a href="ftp://ftp.wormbase.org/pub/wormbase/releases/WS259">ftp://ftp.wormbase.org/pub/wormbase/releases/WS259</a>                                 | PRJNA194557 | Caenorhabditis_sp_5-JU800-1.0    | 46280      | 40        |
| <i>Caenorhabditis tropicalis</i>  | V     | wormbase.org                                               | <a href="ftp://ftp.wormbase.org/pub/wormbase/releases/WS259">ftp://ftp.wormbase.org/pub/wormbase/releases/WS259</a>                                 | PRJNA53597  | Caenorhabditis_sp11_JU1373-3.0.1 | 27721      | 36        |
| <i>Dictyocaulus viviparus</i>     | V     | parasite.wormbase.org                                      | <a href="ftp://ftp.ebi.ac.uk/pub/databases/wormbase/parasite/releases/WBPS9">ftp://ftp.ebi.ac.uk/pub/databases/wormbase/parasite/releases/WBPS9</a> | PRJNA72587  | D_viviparus_9.2.1.ec.pg          | 13514      | 24        |
| <i>Dirofilaria immitis</i>        | III   | parasite.wormbase.org                                      | <a href="ftp://ftp.ebi.ac.uk/pub/databases/wormbase/parasite/releases/WBPS9">ftp://ftp.ebi.ac.uk/pub/databases/wormbase/parasite/releases/WBPS9</a> | PRJEB1797   | nDi.2.2                          | 12857      | 30        |

## Supplementary Materials

|                                      |     |                                                            |                                                                    |                                    |                                   |       |    |
|--------------------------------------|-----|------------------------------------------------------------|--------------------------------------------------------------------|------------------------------------|-----------------------------------|-------|----|
| <i>Ditylenchus destructor</i>        | IV  | parasite.wormbase.org                                      | ftp://ftp.ebi.ac.uk/pub/databases/wormbase/parasite/releases/WBPS9 | PRJNA312427                        | ASM157970v1                       | 13938 | 28 |
| <i>Globodera pallida</i>             | IV  | parasite.wormbase.org                                      | ftp://ftp.ebi.ac.uk/pub/databases/wormbase/parasite/releases/WBPS9 | PRJEB123                           | GPAL001                           | 16403 | 18 |
| <i>Globodera rostochiensis</i>       | IV  | parasite.wormbase.org                                      | ftp://ftp.ebi.ac.uk/pub/databases/wormbase/parasite/releases/WBPS9 | PRJEB13504                         | nGr                               | 14309 | 27 |
| <i>Haemonchus contortus</i>          | V   | parasite.wormbase.org                                      | ftp://ftp.ebi.ac.uk/pub/databases/wormbase/parasite/releases/WBPS9 | PRJEB506                           | Haemonchus_contortus_MHco3-2.0    | 24747 | 44 |
| <i>Heterorhabditis bacteriophora</i> | V   | parasite.wormbase.org                                      | ftp://ftp.ebi.ac.uk/pub/databases/wormbase/parasite/releases/WBPS9 | PRJNA13977                         | Heterorhabditis_bacteriophora-7.0 | 20964 | 18 |
| <i>Loa loa</i>                       | III | parasite.wormbase.org                                      | ftp://ftp.ebi.ac.uk/pub/databases/wormbase/parasite/releases/WBPS9 | PRJNA60051                         | Loa_loa_V3                        | 15445 | 29 |
| <i>Meloidogyne hapla</i>             | IV  | parasite.wormbase.org                                      | ftp://ftp.ebi.ac.uk/pub/databases/wormbase/parasite/releases/WBPS9 | PRJNA29083                         | Freeze_1                          | 14420 | 24 |
| <i>Meloidogyne incognita</i>         | IV  | parasite.wormbase.org                                      | ftp://ftp.ebi.ac.uk/pub/databases/wormbase/parasite/releases/WBPS9 | PRJEA28837                         | ASM18041v1a                       | 20365 | 30 |
| <i>Necator americanus</i>            | V   | parasite.wormbase.org                                      | ftp://ftp.ebi.ac.uk/pub/databases/wormbase/parasite/releases/WBPS9 | PRJNA72135                         | N_americanus_v1                   | 19153 | 18 |
| <i>Onchocerca volvulus</i>           | III | wormbase.org                                               | ftp://ftp.wormbase.org/pub/wormbase/releases/WS259                 | PRJEB513                           | O_volvulus_Cameroon_v3            | 12225 | 36 |
| <i>Oscheius tipulae</i>              | V   | <a href="http://caenorhabditis.org">caenorhabditis.org</a> | http://download.caenorhabditis.org/v1/sequence/                    | CEW1_nOt2                          | nOt.2.0                           | 14938 | 43 |
| <i>Panagrellus redivivus</i>         | IV  | wormbase.org                                               | ftp://ftp.wormbase.org/pub/wormbase/releases/WS259                 | PRJNA186477                        | Pred3                             | 26372 | 40 |
| <i>Parastrongyloides trichosuri</i>  | IV  | parasite.wormbase.org                                      | ftp://ftp.ebi.ac.uk/pub/databases/wormbase/parasite/releases/WBPS9 | PRJEB515                           | P_trichosuri_KNP_v2_0_4           | 15010 | 31 |
| <i>Pristionchus expectatus</i>       | V   | pristionchus.org                                           | http://pristionchus.org/download/                                  | expectatus_augustus_prediction2013 | P_expectatus_v1                   | 29247 | 34 |
| <i>Pristionchus pacificus</i>        | V   | pristionchus.org                                           | http://pristionchus.org/download/                                  | pacificus_Hybrid2_annotations      | Hybrid2                           | 27278 | 23 |
| <i>Rhabditophanes sp. kr3021</i>     | IV  | parasite.wormbase.org                                      | ftp://ftp.ebi.ac.uk/pub/databases/wormbase/parasite/releases/WBPS9 | PRJEB1297                          | Rhabditophanes_sp_KR3021_v2_0_4   | 13496 | 26 |
| <i>Romanomermis culicivorax</i>      | I   | parasite.wormbase.org                                      | ftp://ftp.ebi.ac.uk/pub/databases/wormbase/parasite/releases/WBPS9 | PRJEB1358                          | nRc.2.0                           | 48376 | 15 |

## Supplementary Materials

|                                        |     |                       |                                                                    |             |                             |       |    |
|----------------------------------------|-----|-----------------------|--------------------------------------------------------------------|-------------|-----------------------------|-------|----|
| <i>Steinernema carpocapsae</i>         | IV  | parasite.wormbase.org | ftp://ftp.ebi.ac.uk/pub/databases/wormbase/parasite/releases/WBPS9 | PRJNA202318 | S_carpo_v1_submitted        | 31944 | 46 |
| <i>Steinernema feltiae</i>             | IV  | parasite.wormbase.org | ftp://ftp.ebi.ac.uk/pub/databases/wormbase/parasite/releases/WBPS9 | PRJNA204661 | S_felt_v1_submitted         | 36434 | 45 |
| <i>Steinernema glaseri</i>             | IV  | parasite.wormbase.org | ftp://ftp.ebi.ac.uk/pub/databases/wormbase/parasite/releases/WBPS9 | PRJNA204943 | S_glas_v1_submitted         | 37119 | 40 |
| <i>Steinernema monticolum</i>          | IV  | parasite.wormbase.org | ftp://ftp.ebi.ac.uk/pub/databases/wormbase/parasite/releases/WBPS9 | PRJNA205067 | S_monti_v1_submitted        | 38381 | 39 |
| <i>Steinernema scapterisci</i>         | IV  | parasite.wormbase.org | ftp://ftp.ebi.ac.uk/pub/databases/wormbase/parasite/releases/WBPS9 | PRJNA204942 | S_scapt_v1_submitted        | 33149 | 46 |
| <i>Strongyloides papillosus</i>        | IV  | parasite.wormbase.org | ftp://ftp.ebi.ac.uk/pub/databases/wormbase/parasite/releases/WBPS9 | PRJEB525    | S_papillosus_LIN_v2_1_4     | 18456 | 29 |
| <i>Strongyloides ratti</i>             | IV  | wormbase.org          | ftp://ftp.wormbase.org/pub/wormbase/releases/WS259                 | PRJEB125    | S_ratti_ED321_v5_0_4        | 12483 | 31 |
| <i>Strongyloides stercoralis</i>       | IV  | parasite.wormbase.org | ftp://ftp.ebi.ac.uk/pub/databases/wormbase/parasite/releases/WBPS9 | PRJEB528    | S_stercoralis_PV0001_v2_0_4 | 13098 | 28 |
| <i>Strongyloides venezuelensis</i>     | IV  | parasite.wormbase.org | ftp://ftp.ebi.ac.uk/pub/databases/wormbase/parasite/releases/WBPS9 | PRJEB530    | S_venezuelensis_HH1_v2_0_4  | 16904 | 25 |
| <i>Toxocara canis</i>                  | III | parasite.wormbase.org | ftp://ftp.ebi.ac.uk/pub/databases/wormbase/parasite/releases/WBPS9 | PRJNA248777 | Toxocara_canis_adult_r1.0   | 18596 | 58 |
| <i>Trichinella britovi</i>             | I   | parasite.wormbase.org | ftp://ftp.ebi.ac.uk/pub/databases/wormbase/parasite/releases/WBPS9 | PRJNA257433 | T3_ISS120_r1.0              | 20907 | 20 |
| <i>Trichinella murrelli</i>            | I   | parasite.wormbase.org | ftp://ftp.ebi.ac.uk/pub/databases/wormbase/parasite/releases/WBPS9 | PRJNA257433 | T5_ISS417_r1.0              | 18645 | 19 |
| <i>Trichinella nativa</i>              | I   | parasite.wormbase.org | ftp://ftp.ebi.ac.uk/pub/databases/wormbase/parasite/releases/WBPS9 | PRJNA257433 | T2_ISS10_r1.0               | 17293 | 22 |
| <i>Trichinella nelsoni</i>             | I   | parasite.wormbase.org | ftp://ftp.ebi.ac.uk/pub/databases/wormbase/parasite/releases/WBPS9 | PRJNA257433 | T7_ISS37_r1.0               | 17008 | 21 |
| <i>Trichinella papuae</i>              | I   | parasite.wormbase.org | ftp://ftp.ebi.ac.uk/pub/databases/wormbase/parasite/releases/WBPS9 | PRJNA257433 | T10_ISS1980_r1.0            | 16247 | 22 |
| <i>Trichinella patagoniensis</i>       | I   | parasite.wormbase.org | ftp://ftp.ebi.ac.uk/pub/databases/wormbase/parasite/releases/WBPS9 | PRJNA257433 | T12_ISS2496_r1.0            | 19538 | 21 |
| <i>Trichinella pseudospiralis</i> T4.1 | I   | parasite.wormbase.org | ftp://ftp.ebi.ac.uk/pub/databases/wormbase/parasite/releases/WBPS9 | PRJNA257433 | T4_ISS13_r1.0               | 17161 | 22 |

## Supplementary Materials

|                                        |     |                       |                                                                    |             |                             |       |    |
|----------------------------------------|-----|-----------------------|--------------------------------------------------------------------|-------------|-----------------------------|-------|----|
| <i>Trichinella pseudospiralis</i> T4.2 | I   | parasite.wormbase.org | ftp://ftp.ebi.ac.uk/pub/databases/wormbase/parasite/releases/WBPS9 | PRJNA257433 | T4_ISS588_r1.0              | 17158 | 20 |
| <i>Trichinella pseudospiralis</i> T4.3 | I   | parasite.wormbase.org | ftp://ftp.ebi.ac.uk/pub/databases/wormbase/parasite/releases/WBPS9 | PRJNA257433 | T4_ISS176_r1.0              | 16961 | 18 |
| <i>Trichinella pseudospiralis</i> T4.4 | I   | parasite.wormbase.org | ftp://ftp.ebi.ac.uk/pub/databases/wormbase/parasite/releases/WBPS9 | PRJNA257433 | T4_ISS470_r1.0              | 14920 | 23 |
| <i>Trichinella pseudospiralis</i> T4.5 | I   | parasite.wormbase.org | ftp://ftp.ebi.ac.uk/pub/databases/wormbase/parasite/releases/WBPS9 | PRJNA257433 | T4_ISS141_r1.0              | 16075 | 21 |
| <i>Trichinella</i> sp. t6              | I   | parasite.wormbase.org | ftp://ftp.ebi.ac.uk/pub/databases/wormbase/parasite/releases/WBPS9 | PRJNA257433 | T6_ISS34_r1.0               | 19518 | 21 |
| <i>Trichinella</i> sp. t8              | I   | parasite.wormbase.org | ftp://ftp.ebi.ac.uk/pub/databases/wormbase/parasite/releases/WBPS9 | PRJNA257433 | T8_ISS272_r1.0              | 18455 | 20 |
| <i>Trichinella</i> sp. t9              | I   | parasite.wormbase.org | ftp://ftp.ebi.ac.uk/pub/databases/wormbase/parasite/releases/WBPS9 | PRJNA257433 | T9_ISS409_r1.0              | 18558 | 19 |
| <i>Trichinella spiralis</i>            | I   | parasite.wormbase.org | ftp://ftp.ebi.ac.uk/pub/databases/wormbase/parasite/releases/WBPS9 | PRJNA257433 | T1_ISS3_r1.0                | 19244 | 23 |
| <i>Trichinella zimbabwensis</i>        | I   | parasite.wormbase.org | ftp://ftp.ebi.ac.uk/pub/databases/wormbase/parasite/releases/WBPS9 | PRJNA257433 | T11_ISS1029_r1.0            | 19269 | 21 |
| <i>Trichuris suis</i>                  | I   | parasite.wormbase.org | ftp://ftp.ebi.ac.uk/pub/databases/wormbase/parasite/releases/WBPS9 | PRJNA208415 | Tsuis_adult_male_1.0        | 14436 | 18 |
| <i>Wuchereria bancrofti</i>            | III | parasite.wormbase.org | ftp://ftp.ebi.ac.uk/pub/databases/wormbase/parasite/releases/WBPS9 | PRJNA275548 | Wb_PNG_Genome_assembly_pt22 | 11068 | 31 |

**Supplementary Table 3:** Phylogeny- versus sequence-based classification of nematode ZP modules. Phylogenetic and structural analysis of nematode ZP modules identified three major groups of modules with distinct ZP-C domain disulfide binding patterns (Types 1, 2, and 3), as shown in Figure 2 of the main text. Cohen et al. (2019 *Genetics* vol. 211) independently classified *C. elegans* ZP modules into groups based on the number of cysteine residues found within the ZP-C domain. The results of these two approaches are largely but not completely congruent, with disagreements occurring as a result of lineage-specific gains and losses of disulfides that alter the cysteine count.

#### Module Classification

| Protein  | Present study<br>(Phylogenetics and<br>Homology Modelling) | Cohen et al.<br>(Cysteine Counting) |
|----------|------------------------------------------------------------|-------------------------------------|
| CUTL-17  | Type 1                                                     | I (6 CYS)                           |
| CUTL-18  | Type 1                                                     | I (6 CYS)                           |
| CUTL-20a | Type 1                                                     | I (6 CYS)                           |
| CUTL-24b | Type 1                                                     | II (4 CYS)                          |
| CUTL-25  | Type 1                                                     | I (6 CYS)                           |
| CUTL-26b | Type 1                                                     | IIIb (8 CYS)                        |
| CUTL-27  | Type 1                                                     | I (6 CYS)                           |
| CUTL-28  | Type 1                                                     | II (4 CYS)                          |
| CUTL-29  | Type 1                                                     | I (6 CYS)                           |
| DYF-7    | Type 1                                                     | I (6 CYS)                           |
| FBN-1a   | Type 1                                                     | IIIb (8 CYS)                        |
| LET-653b | Type 1                                                     | IIIb (8 CYS)                        |
| NOAH-1c  | Type 1                                                     | I (6 CYS)                           |
| NOAH-2   | Type 1                                                     | I (6 CYS)                           |
| T23F1.5  | Type 1                                                     | I (6 CYS)                           |
| CUT-6    | Type 2                                                     | IIIb (8 CYS)                        |
| CUTL-5   | Type 2                                                     | IIIb (8 CYS)                        |
| CUTL-6   | Type 2                                                     | IIIb (8 CYS)                        |
| CUTL-7   | Type 2                                                     | IIIb (8 CYS)                        |
| CUTL-8a  | Type 2                                                     | IIIb (8 CYS)                        |
| CUTL-9   | Type 2                                                     | IIIb (8 CYS)                        |
| CUTL-10  | Type 2                                                     | IIIb (8 CYS)                        |
| CUTL-11  | Type 2                                                     | IIIb (8 CYS)                        |
| CUTL-12a | Type 2                                                     | IIIb (8 CYS)                        |
| CUTL-13  | Type 2                                                     | IIIb (8 CYS)                        |
| CUTL-16  | Type 2                                                     | IIIb (8 CYS)                        |
| CUTL-19b | Type 2                                                     | Not considered                      |

Supplementary Materials

|                          |                |              |
|--------------------------|----------------|--------------|
| <b>CUTL-22a</b>          | Type 2         | IIIb (8 CYS) |
| <b>CUTL-23a</b>          | Type 2         | IIIb (8 CYS) |
| <b>DPY-1a (M01E10.2)</b> | Type 2         | IIIb (8 CYS) |
| <b>RAM-5</b>             | Type 2         | IIIb (8 CYS) |
| <b>CUT-1</b>             | Type 3         | IIIa (8 CYS) |
| <b>CUT-3</b>             | Type 3         | IIIa (8 CYS) |
| <b>CUT-4</b>             | Type 3         | IIIa (8 CYS) |
| <b>CUT-5b</b>            | Type 3         | IIIa (8 CYS) |
| <b>CUTL-1</b>            | Type 3         | IIIa (8 CYS) |
| <b>CUTL-2</b>            | Type 3         | IIIa (8 CYS) |
| <b>CUTL-3</b>            | Type 3         | IIIa (8 CYS) |
| <b>CUTL-4</b>            | Type 3         | IIIa (8 CYS) |
| <b>CUTL-14</b>           | Type 3         | IIIa (8 CYS) |
| <b>CUTL-15</b>           | Type 3         | IIIa (8 CYS) |
| <b>F46G11.6</b>          | Type 3         | IIIa (8 CYS) |
| <b>T01D1.8b</b>          | Type 3         | IIIa (8 CYS) |
| <b>R52.6</b>             | Not considered | II (4 CYS)   |
| <b>T01D1.8a</b>          | Not considered | II (4 CYS)   |

**Supplementary Table 4:** Codon model analysis of standalone ZP-C domain subfamilies. Three models were fit to each data set: M0, M8a, and M8. Reported for each are the number of parameters (n.p.), the log-likelihood ( $\log_e L$ ), relevant parameter estimates (the total tree length in substitutions per codon, the transition:transversion rate ratio ( $\kappa$ ), and dN/dS distribution parameters ( $\omega$ ,  $p$ ,  $q$ ,  $p_\beta$ , and  $\omega_P$ )), and the  $P$  value for the likelihood ratio test between models M8 and M8a (assuming 1 degree of freedom).

| Subfamily | Model | n.p. | $\log_e L$    | Tree Length | $\kappa$ | dN/dS                                                                         | LRT $P$ value |
|-----------|-------|------|---------------|-------------|----------|-------------------------------------------------------------------------------|---------------|
| CUTL-19   | M0    | 47   | -12939.866121 | 38.28212    | 1.28246  | $\omega = 0.13478$                                                            | —             |
|           | M8a   | 49   | -12536.379917 | 49.23845    | 1.31699  | $p = 0.77247$<br>$q = 4.22570$<br>$p_\beta = 0.99104$                         | —             |
|           | M8    | 50   | -12536.379917 | 49.23844    | 1.31699  | $p = 0.77247$<br>$q = 4.22568$<br>$p_\beta = 0.99104$<br>$\omega_P = 1.00000$ | 1.00000       |
| F46G11.6  | M0    | 63   | -9478.944527  | 42.11027    | 1.57335  | $\omega = 0.09455$                                                            | —             |
|           | M8a   | 65   | -9135.95464   | 57.80803    | 1.72020  | $p = 0.58348$<br>$q = 4.53111$<br>$p_\beta = 0.99999$                         | —             |
|           | M8    | 66   | -9135.95464   | 57.80808    | 1.72020  | $p = 0.58348$<br>$q = 4.53115$<br>$p_\beta = 0.99999$<br>$\omega_P = 1.00000$ | 1.00000       |
| T01D1.8   | M0    | 87   | -12031.667882 | 54.58330    | 1.63196  | $\omega = 0.09392$                                                            | —             |
|           | M8a   | 89   | -11477.597608 | 73.90117    | 1.81456  | $p = 0.65778$<br>$q = 7.09069$<br>$p_\beta = 0.95636$                         | —             |
|           | M8    | 90   | -11477.597608 | 73.90173    | 1.81458  | $p = 0.65779$<br>$q = 7.09099$<br>$p_\beta = 0.95636$<br>$\omega_P = 1.00000$ | 1.00000       |

**Supplementary Table 5:** RaptorX homology modelling results of *C. elegans* ZPD proteins. The full-length protein was analyzed in almost all cases (*Length* and *Input range*); the standalone ZP-C domain proteins (CUTL-19b, F46G11.6, and T01D1.8b) were trimmed to remove predicted N- and C-terminal propeptide features before modelling, and the N-terminus of FBN-1a was trimmed to meet RaptorX input length requirements. Only models generated using the ZP module from human uromodulin (PDB 4wrn) were evaluated to facilitate comparisons among models. 4wrn-models were usually, but not always, the top ranked model; *Rank* refers to the rank assigned to the 4wrn-model by RaptorX. The next six columns (*P value*, *Score*, *uGDT*, *GDT*, *uSeqID*, *SeqID*) report various RaptorX modelling quality statistics. Finally, *ZP-N range* and *ZP-C range* indicate the approximate boundaries of the two domains (relative to the full-length sequence). These ranges reflect the RaptorX subject-template alignment and the domain boundaries reported for the template by Bokhove et al. (2016 *PNAS* vol. 113).

| <i>C. elegans</i> Protein | Length (aa) | Input range | Rank | <i>P value</i> | Score | uGDT | GDT | uSeqID | SeqID | ZP-N range      | ZP-C range |
|---------------------------|-------------|-------------|------|----------------|-------|------|-----|--------|-------|-----------------|------------|
| CUT-1                     | 424         | 1:424       | 1    | 2.0E-08        | 150   | 126  | 45  | 34     | 12    | 28:125          | 149:279    |
| CUT-3                     | 389         | 1:389       | 1    | 3.5E-08        | 150   | 129  | 40  | 32     | 10    | 29:126          | 150:318    |
| CUT-4                     | 507         | 1:507       | 1    | 3.4E-09        | 158   | 131  | 43  | 31     | 10    | 38:133          | 157:302    |
| CUT-5b                    | 379         | 1:379       | 1    | 2.0E-08        | 155   | 128  | 42  | 29     | 9     | 28:127          | 151:303    |
| CUT-6                     | 572         | 1:572       | 1    | 3.2E-06        | 200   | 149  | 26  | 46     | 8     | 228:329         | 353:526    |
| CUTL-1                    | 399         | 1:399       | 1    | 8.9E-09        | 149   | 127  | 37  | 33     | 10    | 55:155          | 179:355    |
| CUTL-2                    | 382         | 1:382       | 1    | 1.1E-11        | 163   | 136  | 41  | 36     | 11    | 24:124          | 150:325    |
| CUTL-3                    | 405         | 1:405       | 1    | 1.9E-08        | 154   | 133  | 38  | 32     | 9     | 29:126          | 186:341    |
| CUTL-4                    | 469         | 1:469       | 2    | 4.5E-08        | 150   | 120  | 41  | 29     | 10    | 31:130          | 160:294    |
| CUTL-5                    | 437         | 1:437       | 2    | 2.5E-08        | 147   | 119  | 42  | 39     | 14    | 29:121          | 150:287    |
| CUTL-6                    | 374         | 1:374       | 1    | 1.2E-08        | 161   | 129  | 40  | 38     | 12    | 35:132          | 156:317    |
| CUTL-7                    | 585         | 1:585       | 1    | 1.3E-09        | 154   | 128  | 49  | 33     | 13    | 80:180          | 204:337    |
| CUTL-8a                   | 625         | 1:625       | 1    | 4.5E-09        | 159   | 119  | 41  | 33     | 11    | 29:129          | 153:292    |
| CUTL-9                    | 562         | 1:562       | 1    | 1.1E-07        | 138   | 118  | 46  | 32     | 13    | NA <sup>a</sup> | 335:490    |
| CUTL-10                   | 403         | 1:403       | 1    | 8.5E-09        | 161   | 129  | 39  | 35     | 10    | 31:131          | 155:331    |
| CUTL-11                   | 384         | 1:384       | 1    | 5.2E-08        | 160   | 116  | 36  | 37     | 11    | 34:135          | 159:318    |
| CUTL-12a                  | 569         | 1:569       | 1    | 1.9E-10        | 160   | 123  | 38  | 39     | 12    | 33:134          | 157:317    |
| CUTL-13                   | 445         | 1:445       | 2    | 1.5E-08        | 157   | 123  | 43  | 36     | 13    | 26:128          | 153:284    |
| CUTL-14                   | 270         | 1:270       | 2    | 4.9E-10        | 153   | 122  | 45  | 36     | 13    | 28:125          | 149:270    |
| CUTL-15                   | 385         | 1:385       | 1    | 8.2E-09        | 158   | 132  | 43  | 36     | 12    | 30:132          | 154:300    |
| CUTL-16                   | 488         | 1:488       | 2    | 1.7E-08        | 150   | 120  | 43  | 29     | 10    | 30:123          | 147:280    |
| CUTL-17                   | 912         | 1:912       | 1    | 4.3E-08        | 156   | 131  | 44  | 37     | 13    | 504:604         | 623:791    |
| CUTL-18                   | 801         | 1:801       | 1    | 2.0E-08        | 147   | 129  | 38  | 35     | 10    | 468:571         | 599:754    |
| CUTL-19b                  | 237         | 21:216      | 1    | 1.4E-06        | 89    | 83   | 42  | 23     | 12    | NA              | 53:208     |
| CUTL-20a                  | 360         | 1:360       | 1    | 7.4E-10        | 142   | 123  | 34  | 25     | 7     | 25:119          | 150:314    |
| CUTL-22a                  | 445         | 1:445       | 1    | 1.0E-08        | 152   | 131  | 43  | 41     | 14    | 58:157          | 187:351    |
| CUTL-23a                  | 773         | 1:773       | 2    | 1.2E-09        | 148   | 127  | 49  | 40     | 16    | 449:546         | 562:699    |



## Supplementary Materials

|                 |      |          |   |         |     |     |    |    |    |           |           |
|-----------------|------|----------|---|---------|-----|-----|----|----|----|-----------|-----------|
| <b>CUTL-24b</b> | 601  | 1:601    | 1 | 1.2E-05 | 104 | 154 | 26 | 41 | 7  | 30:129    | 393:548   |
| <b>CUTL-25</b>  | 385  | 1:385    | 1 | 1.0E-08 | 162 | 137 | 35 | 30 | 8  | 31:131    | 157:338   |
| <b>CUTL-26b</b> | 502  | 1:502    | 1 | 1.7E-07 | 144 | 126 | 44 | 33 | 11 | 29:122    | 135:283   |
| <b>CUTL-27</b>  | 969  | 1:969    | 1 | 2.4E-08 | 146 | 127 | 45 | 36 | 13 | 624:724   | 750:896   |
| <b>CUTL-28</b>  | 696  | 1:696    | 1 | 2.5E-09 | 159 | 124 | 33 | 36 | 10 | 282:381   | 419:589   |
| <b>CUTL-29</b>  | 390  | 1:390    | 1 | 2.2E-08 | 155 | 137 | 43 | 43 | 13 | 22:118    | 152:318   |
| <b>DPY-1a</b>   | 1387 | 1:1387   | 2 | 3.4E-06 | 191 | 151 | 29 | 47 | 9  | 1001:1103 | 1132:1295 |
| <b>DYF-7</b>    | 446  | 1:446    | 1 | 1.5E-08 | 164 | 143 | 41 | 44 | 13 | 26:141    | 165:341   |
| <b>F46G11.6</b> | 160  | 21:160   | 1 | 3.3E-06 | 90  | 77  | 55 | 21 | 15 | NA        | 38:160    |
| <b>FBN-1a</b>   | 2779 | 280:2779 | 1 | 4.1E-09 | 155 | 146 | 43 | 47 | 14 | 2420:2528 | 2555:2713 |
| <b>LET-653b</b> | 653  | 1:653    | 1 | 5.0E-10 | 134 | 140 | 31 | 42 | 9  | 212:316   | 440:597   |
| <b>NOAH-1c</b>  | 1052 | 1:1052   | 1 | 4.1E-08 | 147 | 131 | 37 | 48 | 14 | 632:773   | 804:976   |
| <b>NOAH-2</b>   | 741  | 1:741    | 1 | 4.1E-09 | 163 | 133 | 38 | 39 | 11 | 386:484   | 515:674   |
| <b>RAM-5</b>    | 711  | 1:711    | 2 | 1.5E-10 | 156 | 125 | 46 | 30 | 11 | 33:129    | 141:271   |
| <b>T01D1.8b</b> | 189  | 26:189   | 1 | 3.0E-06 | 94  | 89  | 54 | 20 | 12 | NA        | 47:189    |
| <b>T23F1.5</b>  | 1262 | 1:1262   | 2 | 3.4E-09 | 153 | 116 | 43 | 24 | 9  | 911:1007  | 1039:1172 |

a — Modelling of the *C. elegans* CUTL-9 ZP-N domain failed due to the presence of a long insertion within the DE loop. Homology modelling of CUTL-9 subfamily members (i.e., orthologs from other species) that lack the insertion successfully recovered the ZP-N domain (results not shown).

**Supplementary Figures**

Supplementary Figure 1: Positional map between trimmed and untrimmed versions of *C. elegans* CUT-1. Shown here is an alignment between *C. elegans* CUT-1 (numbered according to sequence position) and a trimmed version of CUT-1 extracted from GISMO alignment #38, the alignment replicate with the highest log-likelihood ratio score (numbered according to alignment column). Lowercase residues in the original CUT-1 sequence indicate positions that were trimmed away during alignment estimation (represented by dashes in the corresponding trimmed sequence); the retained positions comprise the inferred core alignment (including a gap of one residue that was inferred within the CUT-1 core at alignment column 236). Shown above the original CUT-1 sequence are (1) the predicted signal peptide (s), (2) the predicted R/K cleavage cut-site (X), and the interdomain linker (I).

```

          sssssssssssssssssss
AA sequence # 1.....10.....20.....30.....40.....50.....60.....70.....80
CUT-1-ORIGINAL mtwkpiiclaalvlsasaipv dnnvegepeveCGPNSITVNFNTRNPFEGHVYVKGLYDQagCRSDEGGRQVAGIELPFD
CUT-1-ALI38 -----CGPNSITVNFNTRNPFEGHVYVKGLYDQ--CRSDEGGRQVAGIELPFD
Alignment # 1.....10.....20..... 30.....40.....

```

```

                                I I I I I
.....90.....100.....110.....120.....130.....140.....150.....160
SCNTARTRSLNpkgvfvstTVVISFHPQFVTKVDRA YRIQCFYMESDKTvtStqievsDLTTAFQTQVVPMPVCKYEILDG
SCNTARTRSLN-----TTVVISFHPQFVTKVDRA YRIQCFYMESDKT-S-----DLTTAFQTQVVPMPVCKYEILDG
..50..... .60.....70.....80..... . 90.....100.....110..

.....170.....180.....190.....200.....210.....220.....230.....240
GPSGQPIQFATIGQQVYHKWTCDS E t t d TFCAVVH S C T V D D G N G D T V Q I L N E E G C A L D K F L L N N L E Y P T D L M A G Q E A H V Y
GPSGQPIQFATIGQQVYHKWTCDS E ---TFCAVVH S C T V D D G N G D T V Q I L N E E G C A L D K F L L N N L E Y P T D L M A G Q E A H V Y
.....120.....130..... 140.....150.....160.....170.....180.....

.....250.....260.....270.....280.....290.....300.....310.....320
KYADRSQ L F Y Q C Q I S I T I K d p g s E C A R P T C S E P Q g f g a v k q a g a g g a h a a a a p q a g v e e v q a a p v a a a p v a a a a a
KYADRSQ L F Y Q C Q I S I T I K ---E C A R P T C S E P Q -----
190.....200..... 210.....

```

```

                                X
.....330.....340.....350... ..360.....370.....380.....390.....
apavpraTlaqlrlrllRKKRSFGEnegILDVRVE-INTLDIMEGASPSAPEaaalvseesvrrratstgicltpigfasfl
-----T-----RKKRSFGE---ILDVRVE?INTLDIMEGASPSAPE-----
220 ..... 230.....240.....250..

```

```

400.....410.....420.... (424 AA residues)
gigtivatalsatisfyvarptshkh
-----

```

(252 Alignment columns)

Supplementary Figure 2: Branch support metrics for the majority rule consensus tree. (a) Branch Recovery Proportions (BRP) and (b) Transfer Bootstrap Expectations (TBE) for the nematode ZP module majority rule consensus phylogeny. (c) Overlapping histograms showing the distribution of BRP and TBE support values for the entire tree. By definition, no branches have support values below 50% in the majority rule tree.

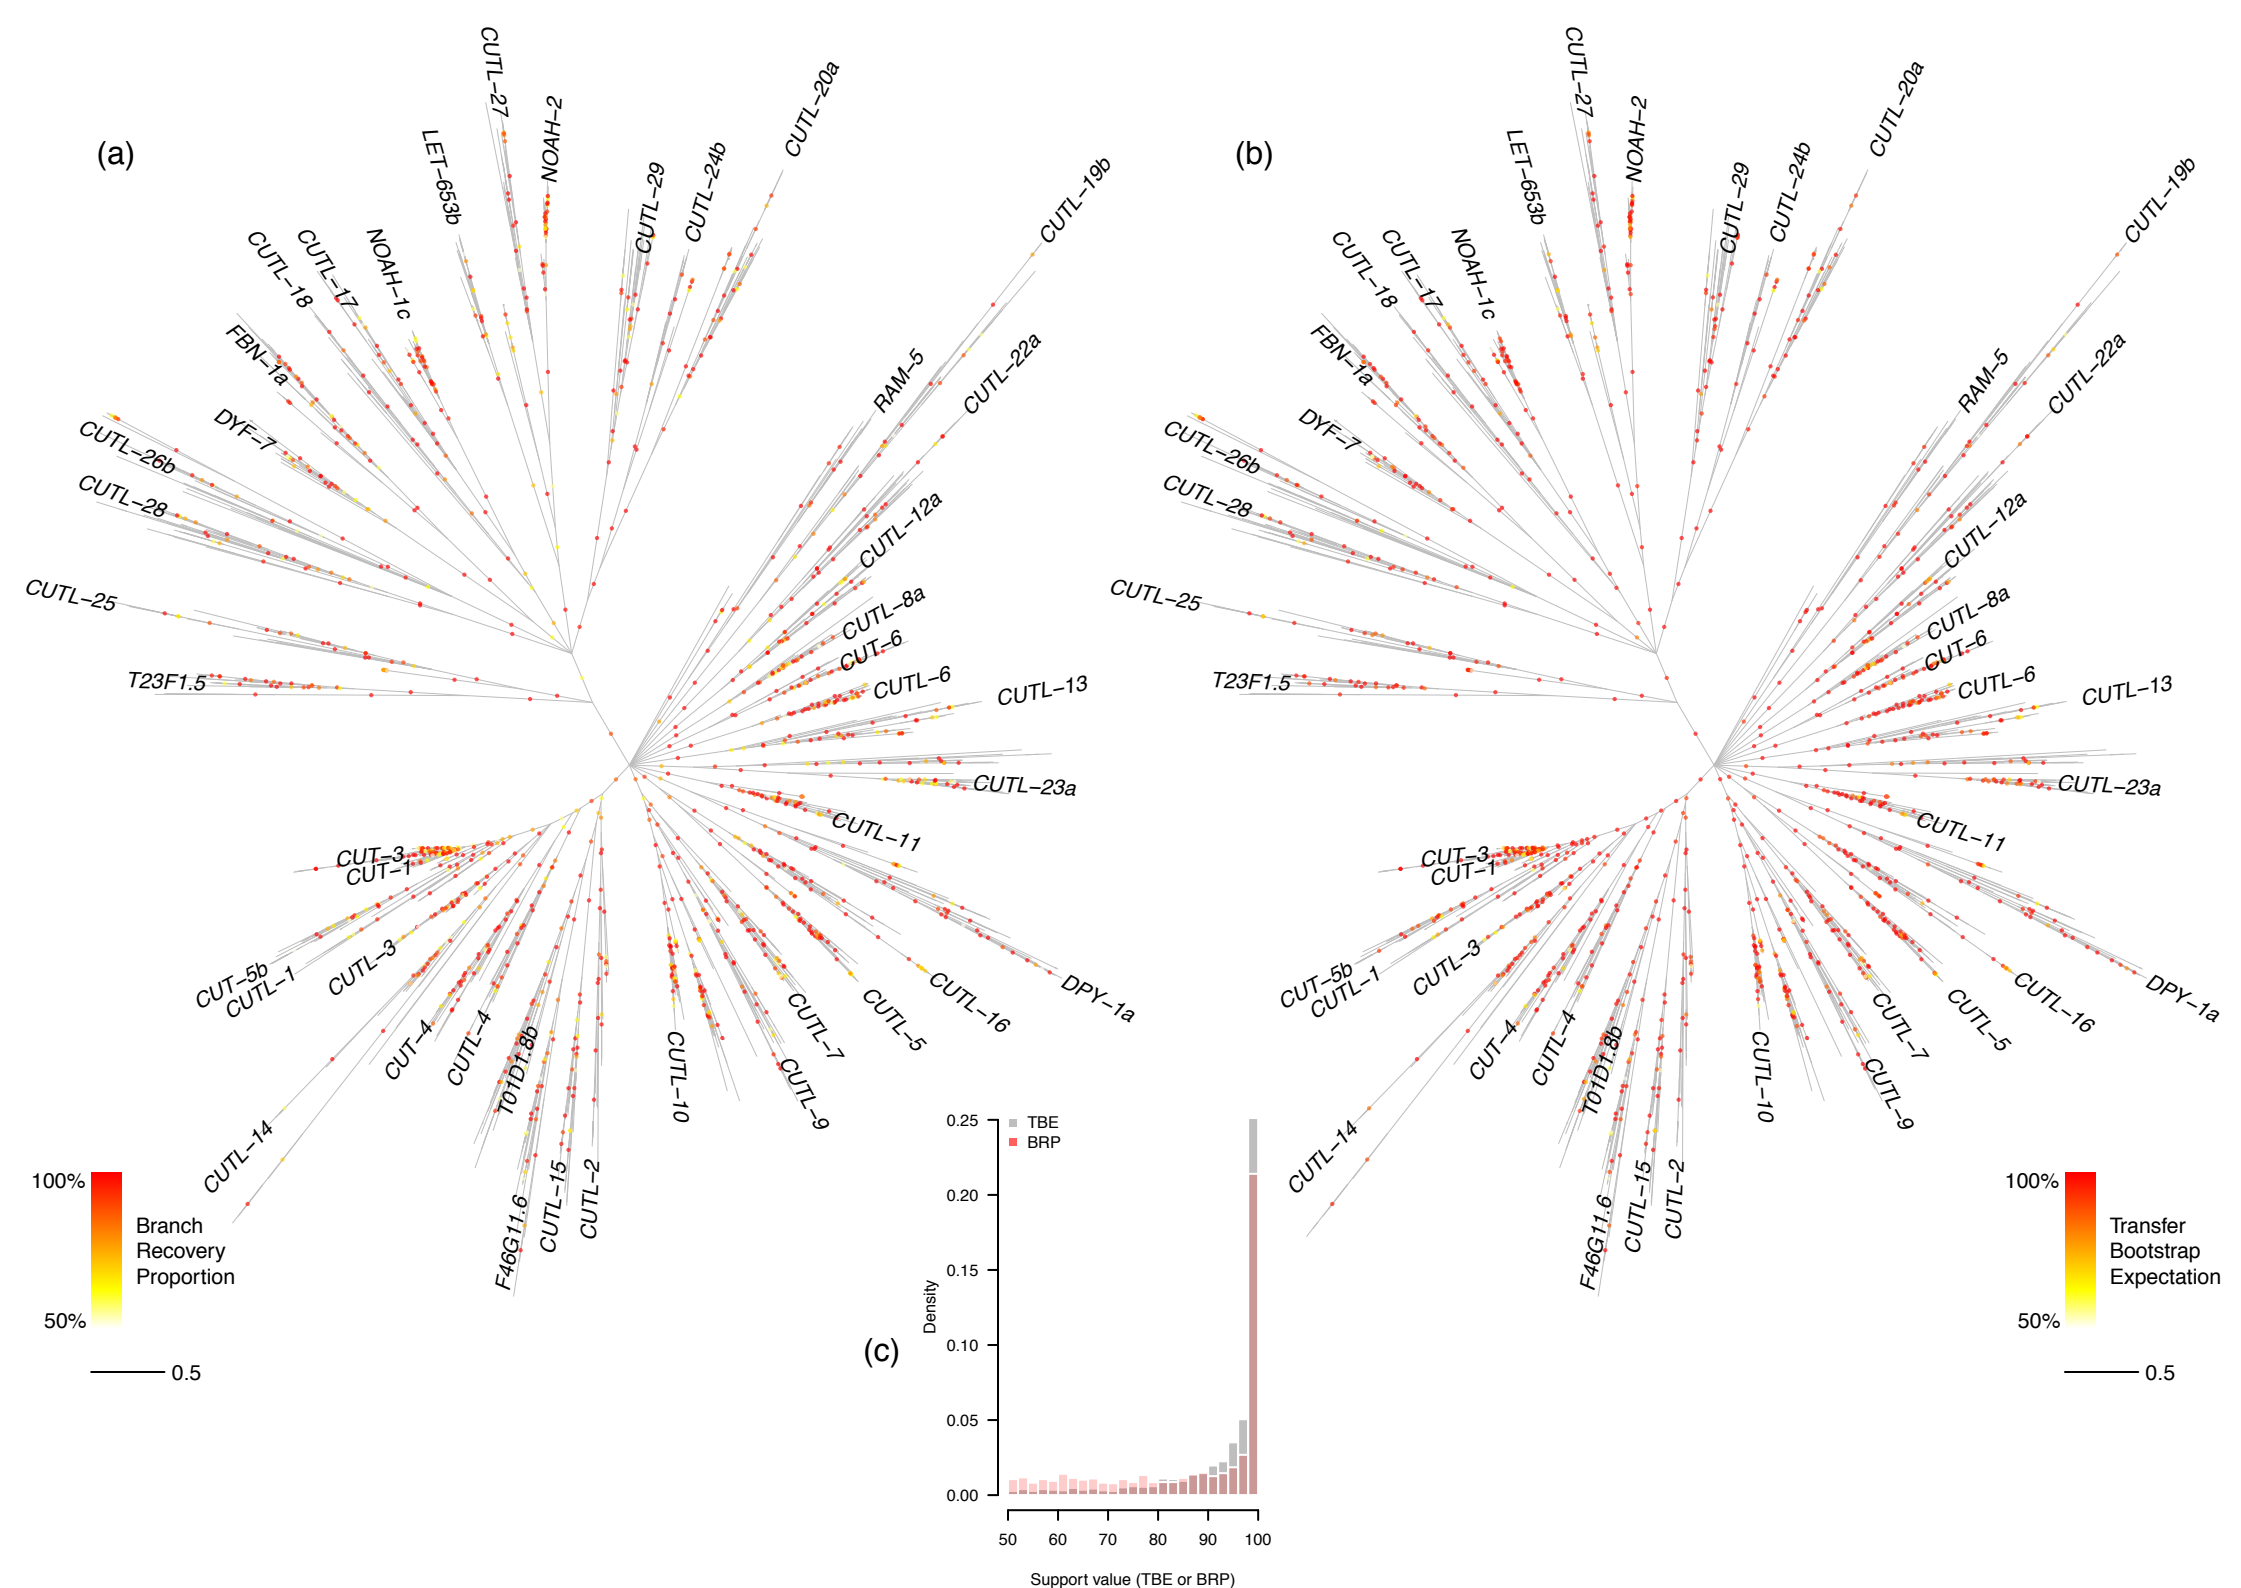

Supplementary Figure 3: Branch support metrics for the focal alignment's maximum likelihood tree. (a) Branch Recovery Proportions (BRP) and (b) Transfer Bootstrap Expectations (TBE) for the nematode ZP module phylogeny inferred using the focal alignment (the top scoring alignment according to LLR score). The labelled arrows on (a) denote the Minimal Ancestor Deviation (MAD) root and the phylogenetic midpoint. Also shown in (a) are the phylogenetic boundaries between the Type 1, 2, and 3 ZP modules. Type 1 modules are paraphyletic, given the MAD root; Type 2 and 3 modules together form a monophyletic group, within which the Type 3 modules form their own monophyletic clade. (c) Overlapping histograms showing the distribution of BRP and TBE support values for the entire tree.

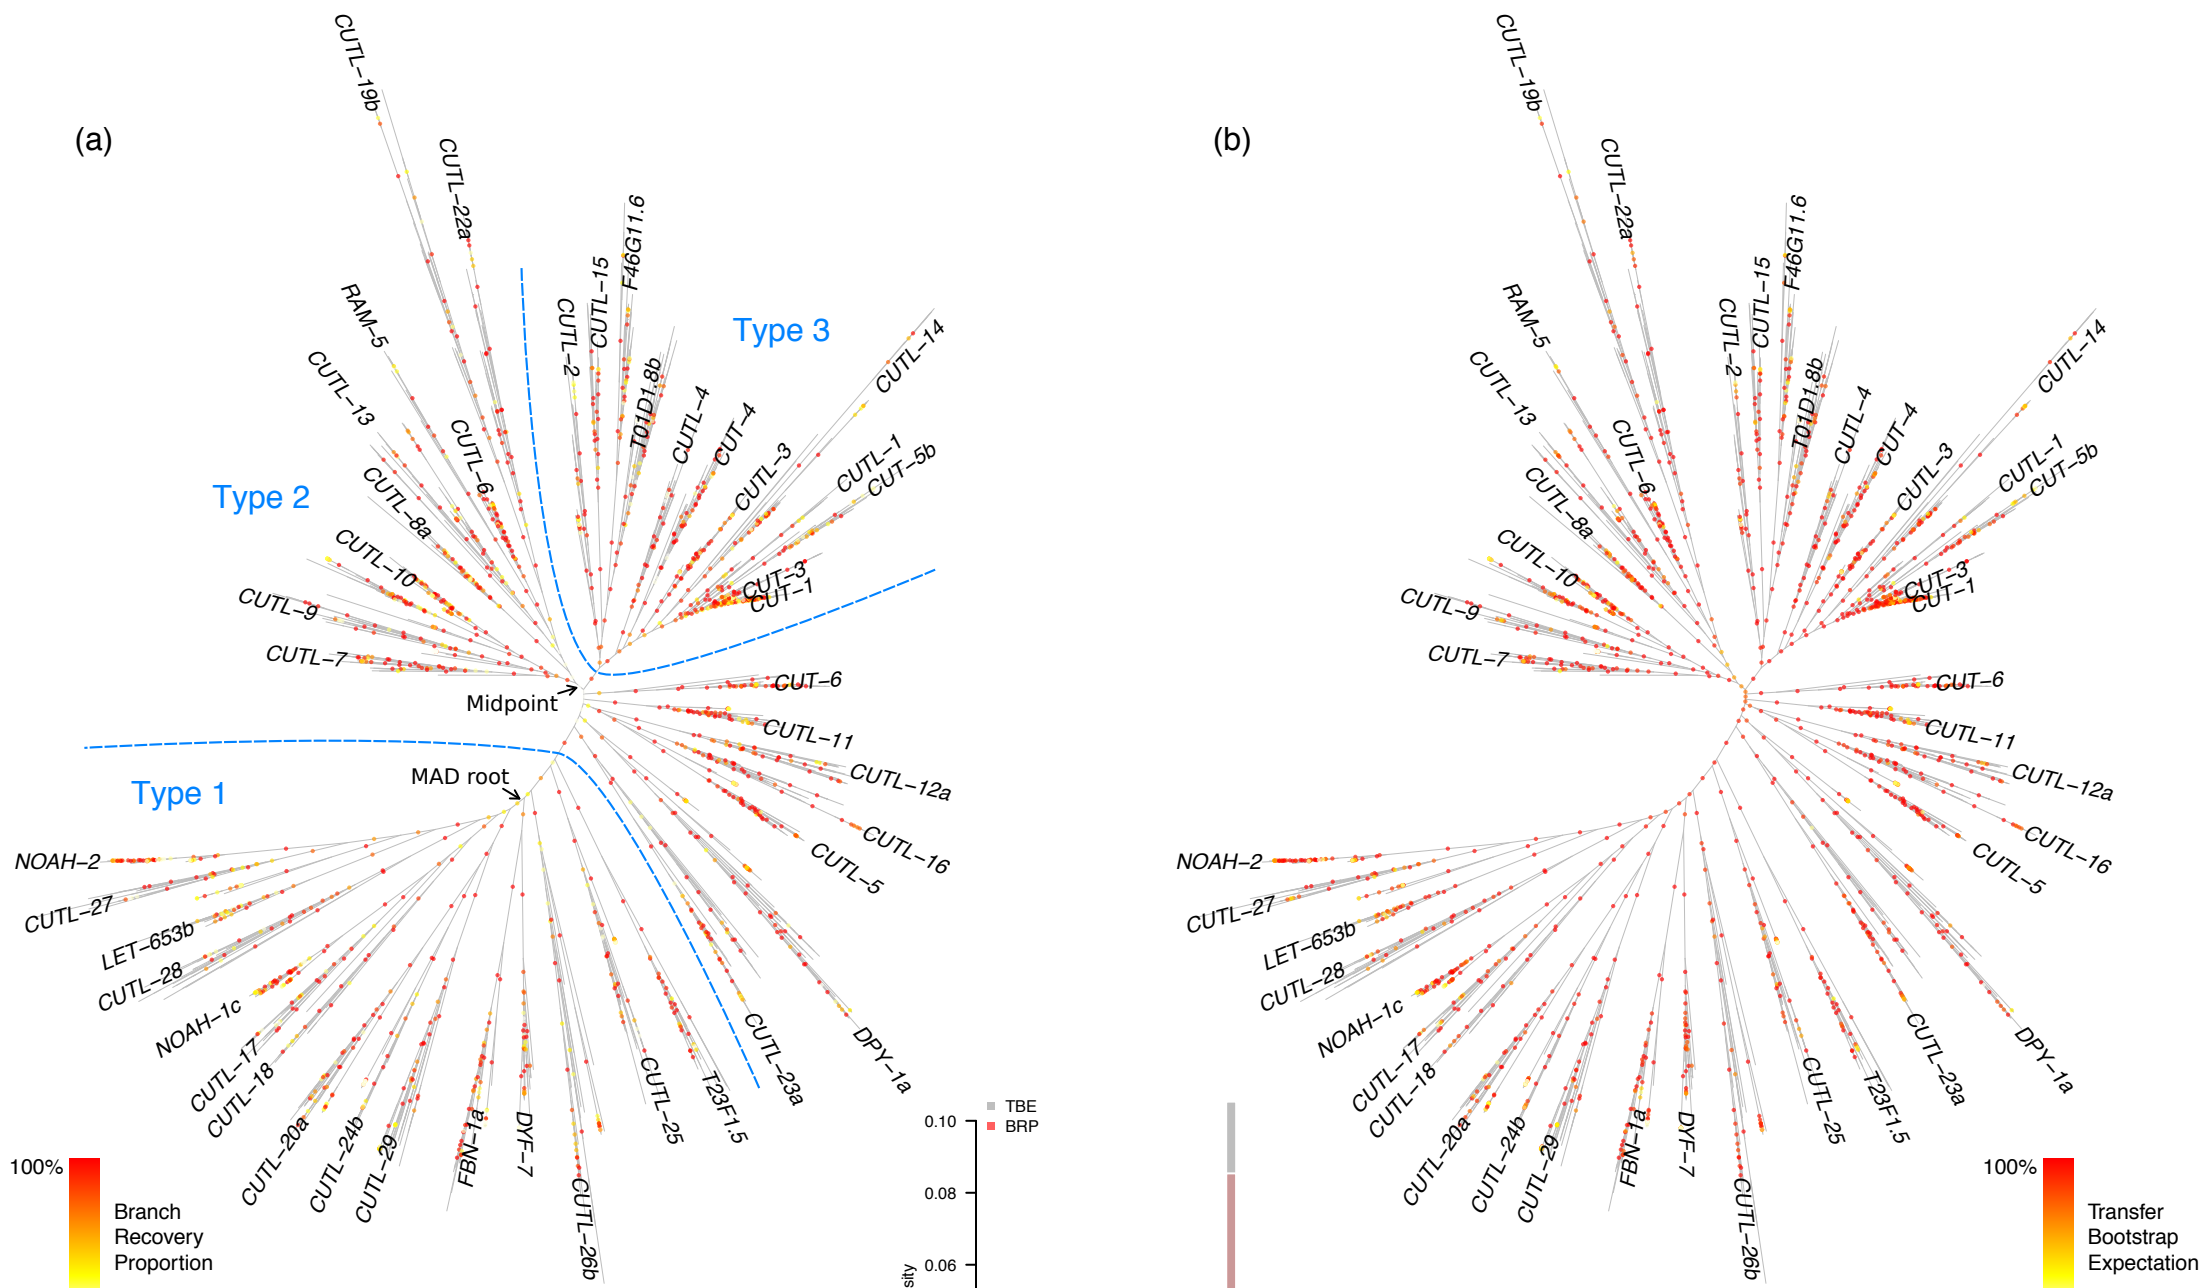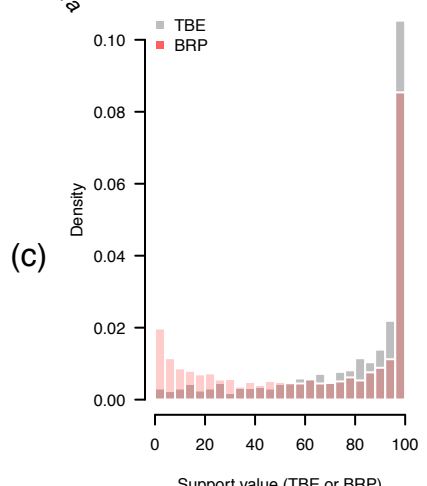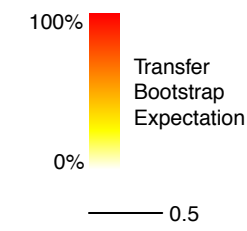

(c)

(a)

(b)

Supplementary Figure 4: Variable amino acid conservation patterns among nematode ZP modules. Amino acid conservation patterns in phylogenetically-defined subsets of the top-scoring nematode ZP module alignment, shown via sequence logos: (a) Type 1 modules, (b) Type 2 modules, (c) Type 3 modules. The height of each amino acid indicates its prevalence at the given position in the subsetting alignment. Connections between cysteine residues indicate inferred disulfide linkages; also shown are the approximate boundaries of the ZP-N and ZP-C domains, the internal and external hydrophobic patches (IHP/EHP), and the consensus cleavage site (CCS). The sequence logo for the entire data set is shown in Figure 1.



(a) Type 1

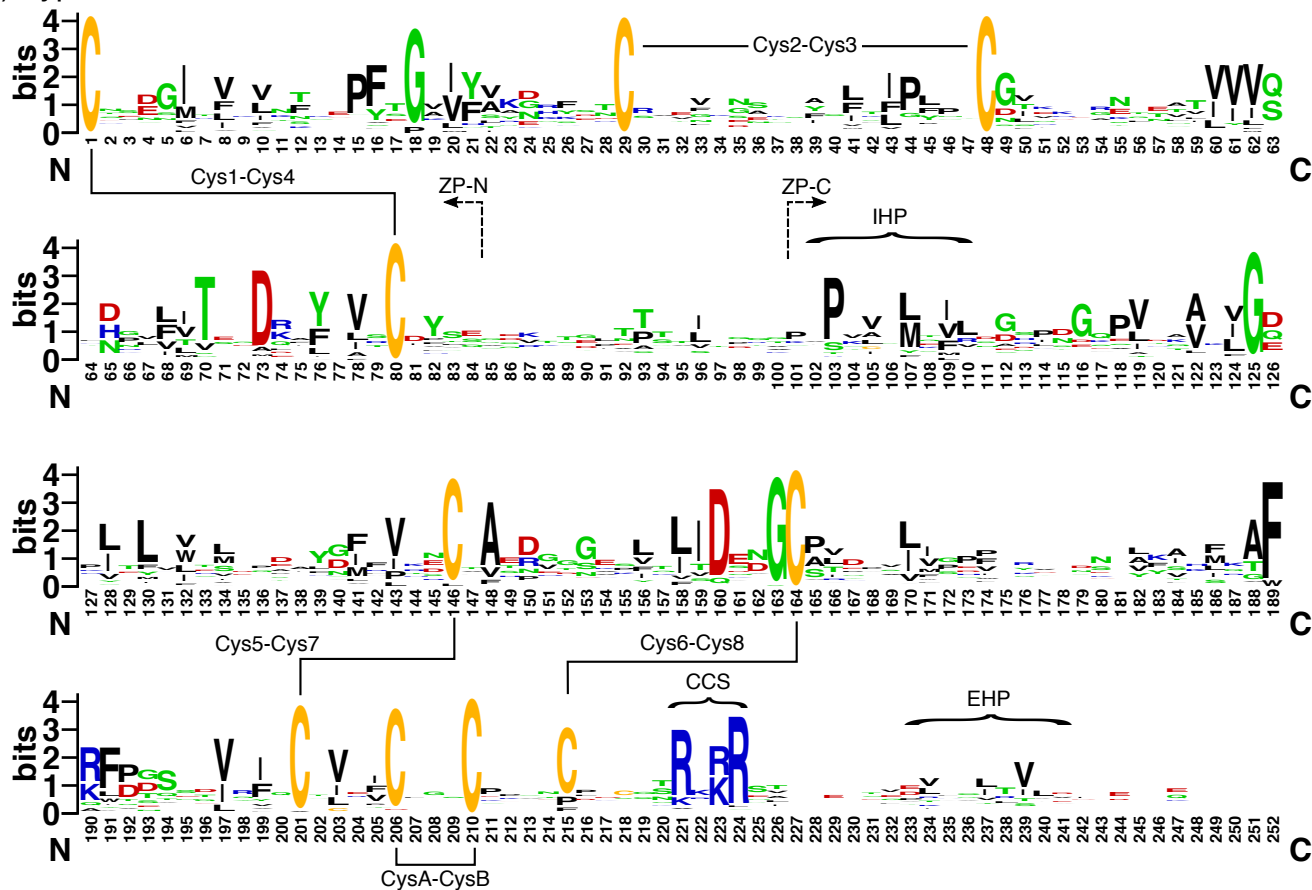

(b) Type 2

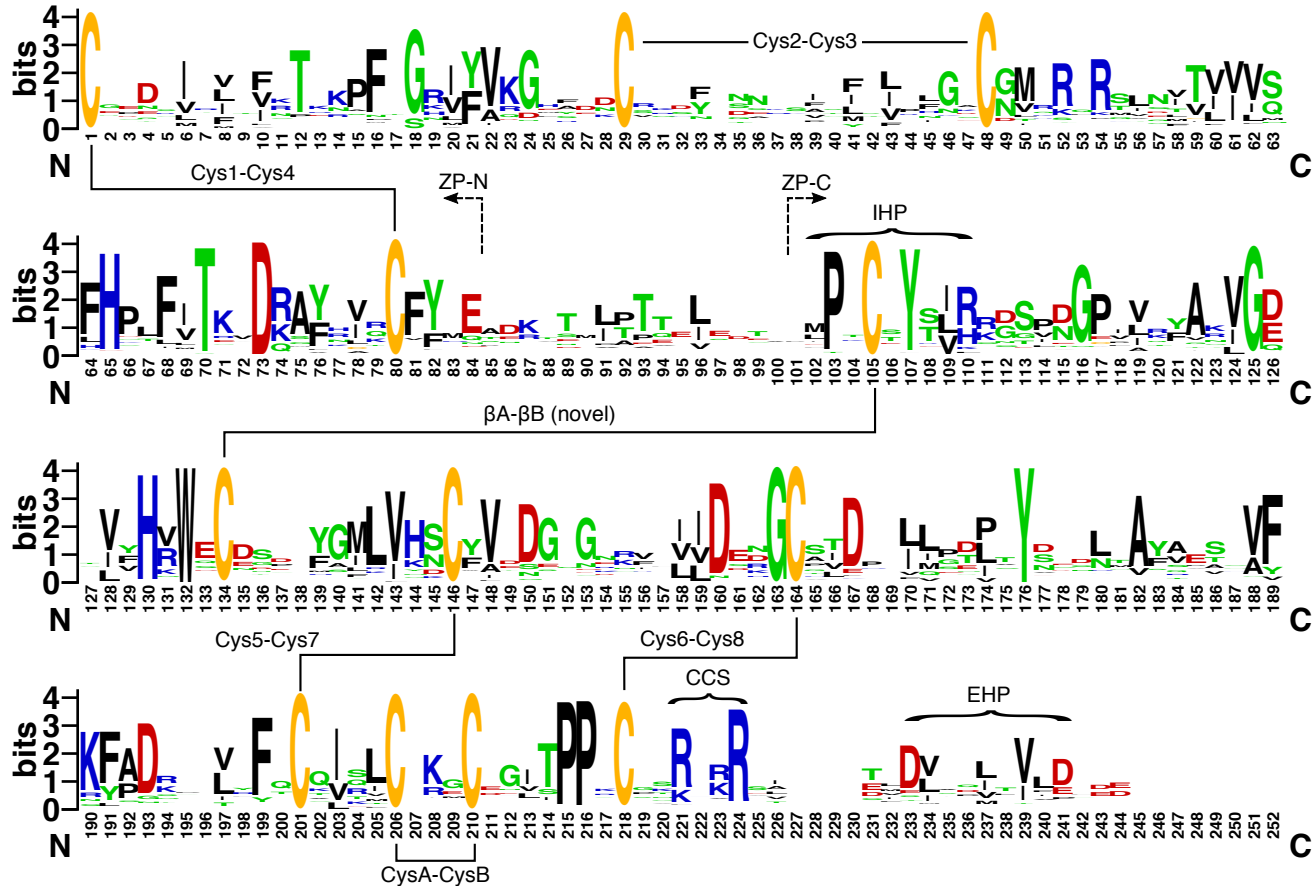

(c) Type 3

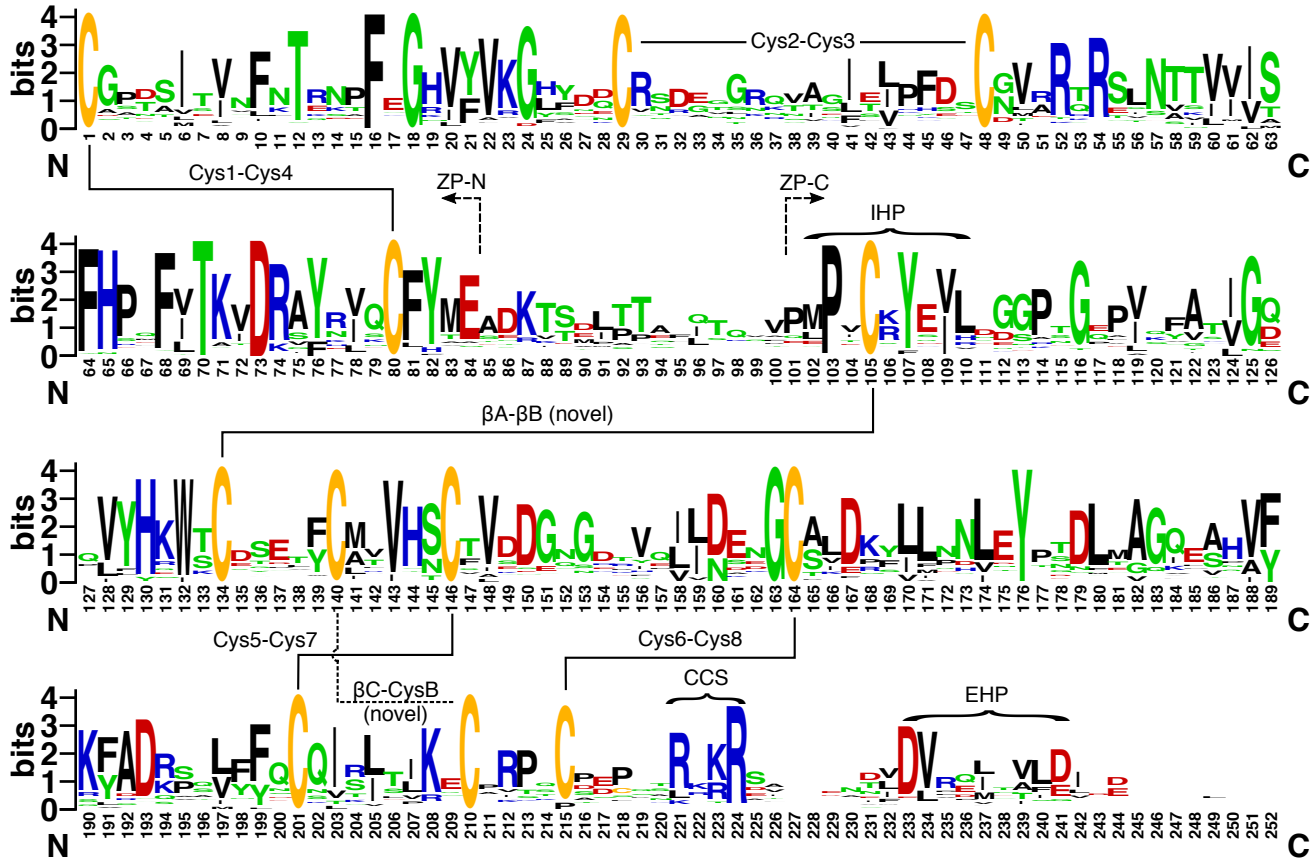

Supplementary Figure 5: Minimal Ancestor Deviation (MAD) rooting of the nematode ZP module phylogeny. (a) Majority rule consensus tree. (b) Fully resolved tree obtained using the focal alignment. Branches are colour-coded by the degree of deviation from clock-like expectation induced by assuming a root on the given branch (AD; see legend). Bars indicate the inferred origins of Type 1, 2, and 3 ZP-C domain cysteine connectivity patterns (Figure 2b). The arrows denote the phylogenetic midpoints. Despite considerable uncertainty in the precise location of the root node, the results strongly point to the root falling somewhere within the Type 1 portion of the phylogeny.

(a) Majority rule consensus tree

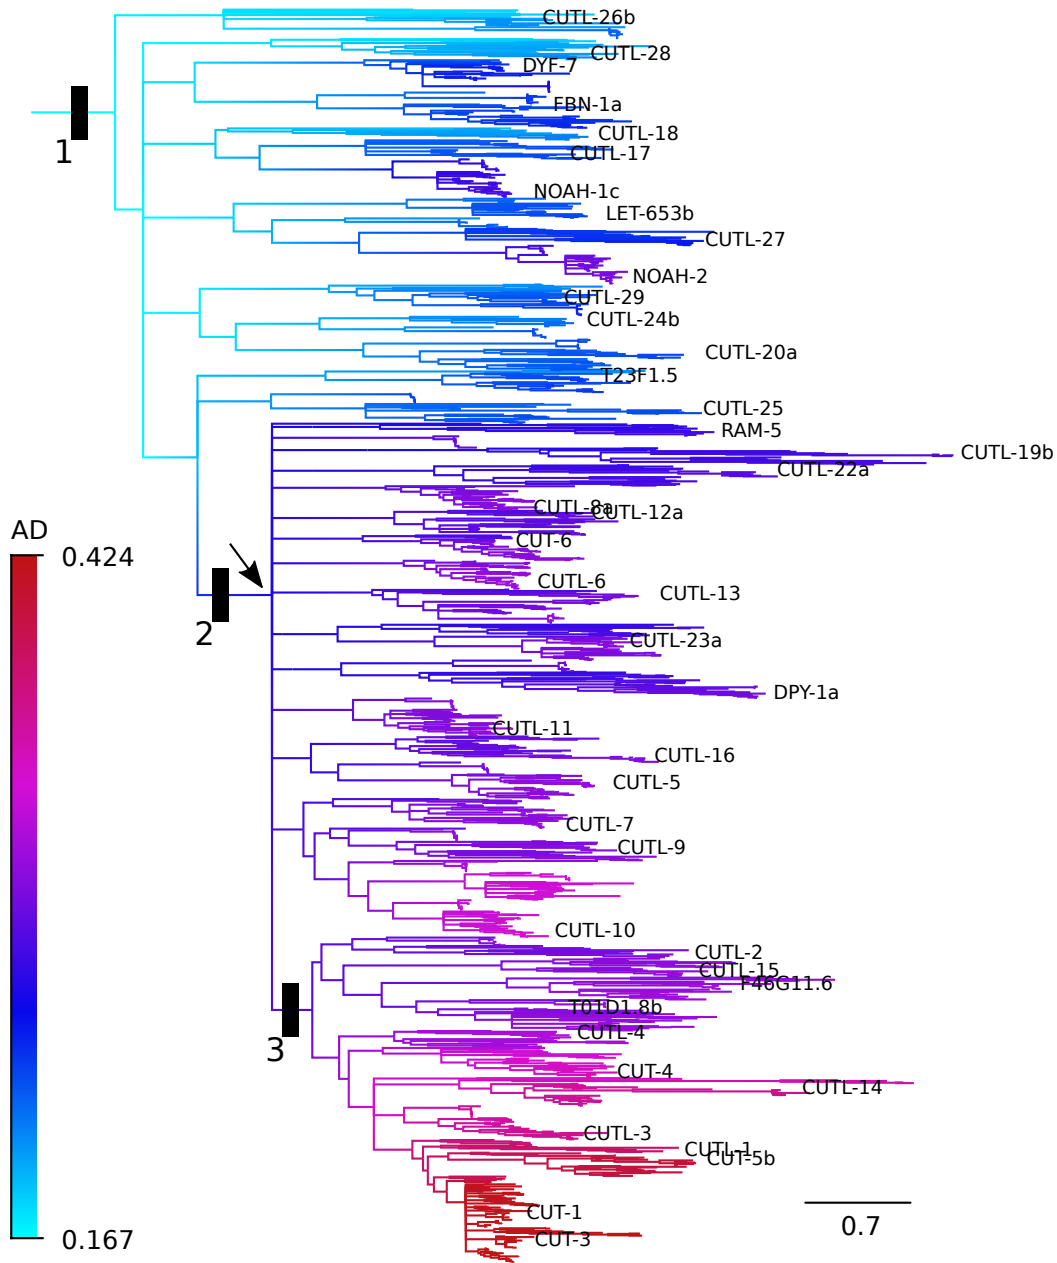

(b) Focal alignment tree

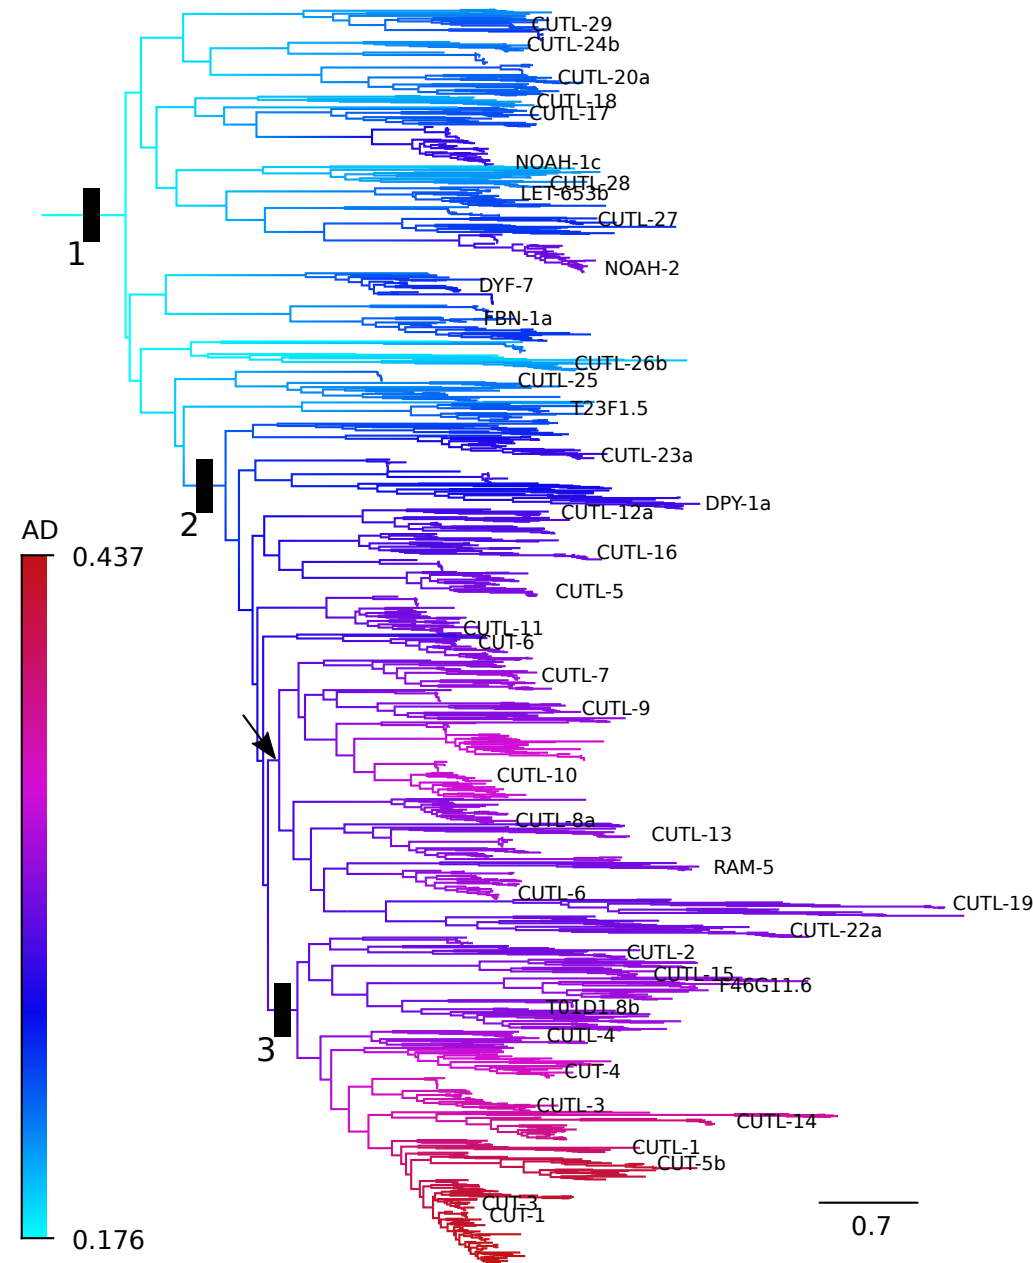

Supplementary Figure 6: Phylogenetic distribution of ZP modules across the major nematode clades. The majority rule consensus tree of Figure 2 (main text) was redrawn to show only the ZP modules from *C. elegans* (a Clade V species) and representative species from the three other major nematode clades covered in the present study (three from Clade I, two from Clade III, and three from Clade IV). Protein names are shown only for *C. elegans* ZP modules; for the other species, only the clade and species IDs are shown (see legend). Clade designations follow Blaxter et al. (1998 *Nature* vol. 392); the four relevant groups are related as follows: (((Clade V, Clade IV), Clade III), Clade I). The broad distribution of ZP modules observed for each of the clades indicates that the duplication events that generated nematode ZP module diversity largely predate the speciation events that gave rise to the major nematode groups.

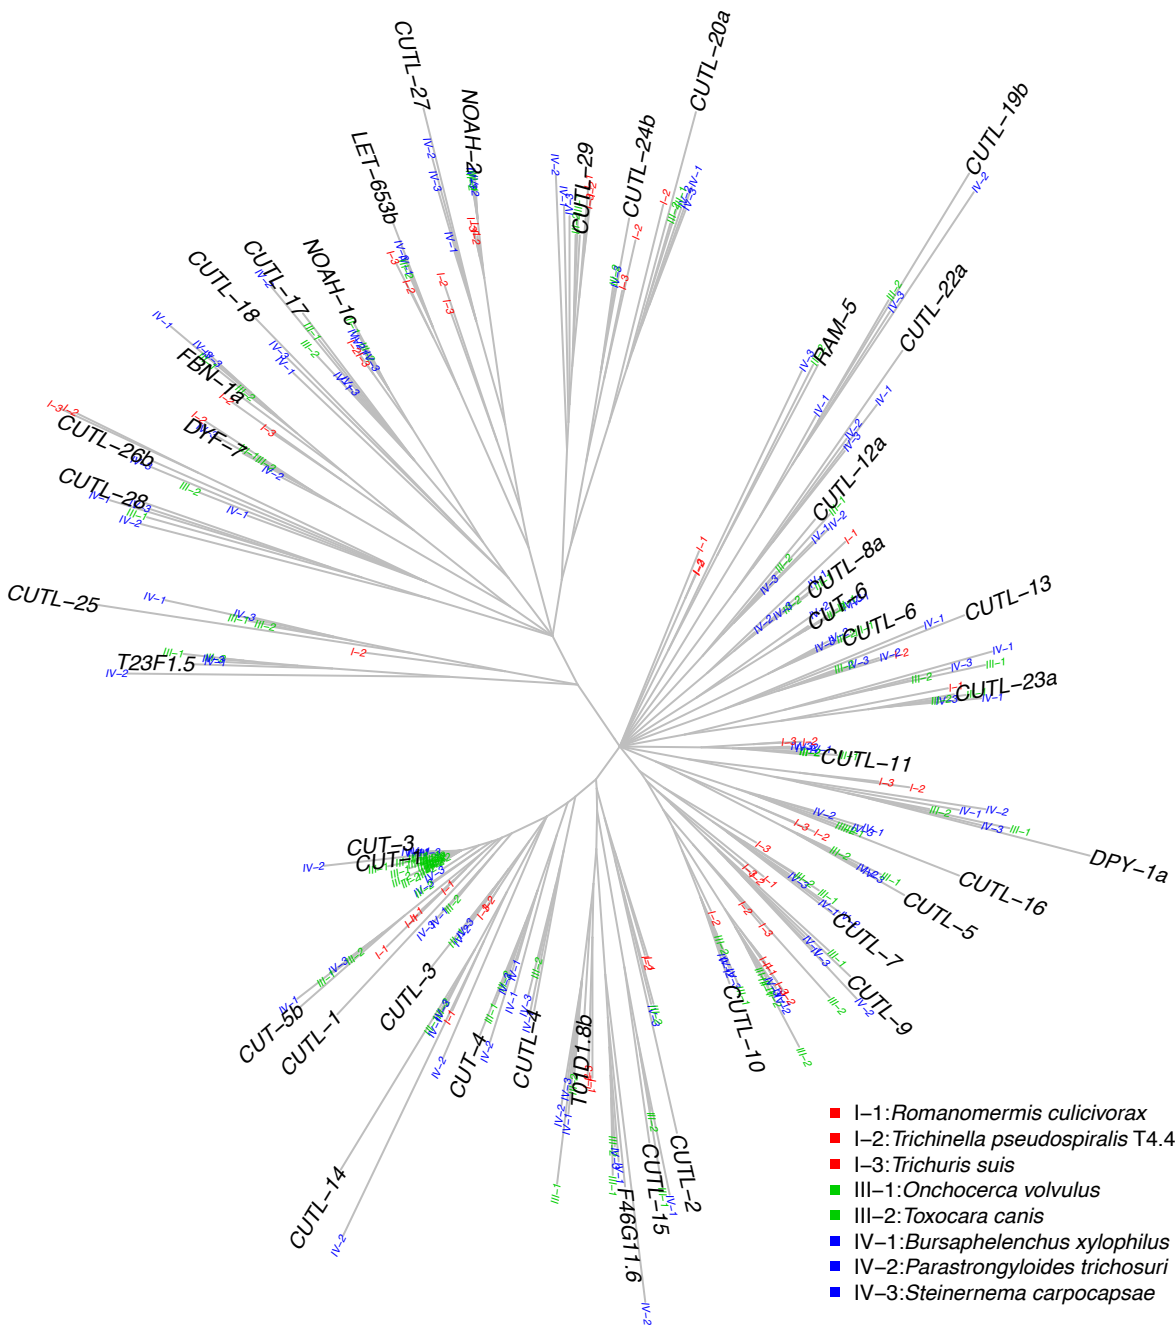

Supplementary Figure 7: Phylogenetic distribution of nematode ZPD protein domain architecture. ZPD proteins often contain additional domains upstream of the ZP module. The most commonly observed Pfam domain predictions (not including 'ZP domain' predictions, which were unsurprisingly the most frequent) were mapped onto the ZP module majority rule consensus tree of Figure 2: green circles = Epidermal Growth Factor (EGF)-like domains; purple crosses = von Willebrand factor type A (vWFA) domains; orange triangles = PAN domains. Tip names are shown only for *C. elegans* ZP modules, with those that possess upstream domains (according to domain annotations on WormBase.org) labelled accordingly.

EGF-like domains were predicted only within the FBN-1 subfamily. vWFA domains were found in the CUT-6, CUTL-23, and DPY-1 subfamilies, as well as in the sister group to the CUTL-23 subfamily (which lacks a *C. elegans* ortholog) and a rogue ZP module from a Clade I nematode. PAN domains were distributed across seven Type 1 subfamilies (CUTL-17, CUTL-18, CUTL-27, CUTL-28, NOAH-1, NOAH-2, and LET-653), consistent with *C. elegans*-based expectations, but were also observed for Clade I nematode ZP modules within the DYF-7 subfamily; subsequent examination showed that this unusual finding was due to the artefactual fusion of CUTL-28 homologs (which possess PAN domains) to DYF-7 homologs (which do not) within Clade I nematodes (results not shown). Assuming false negatives are more plausible than recurrent domain losses within subfamilies, the overall pattern suggests deep conservation of domain architecture.



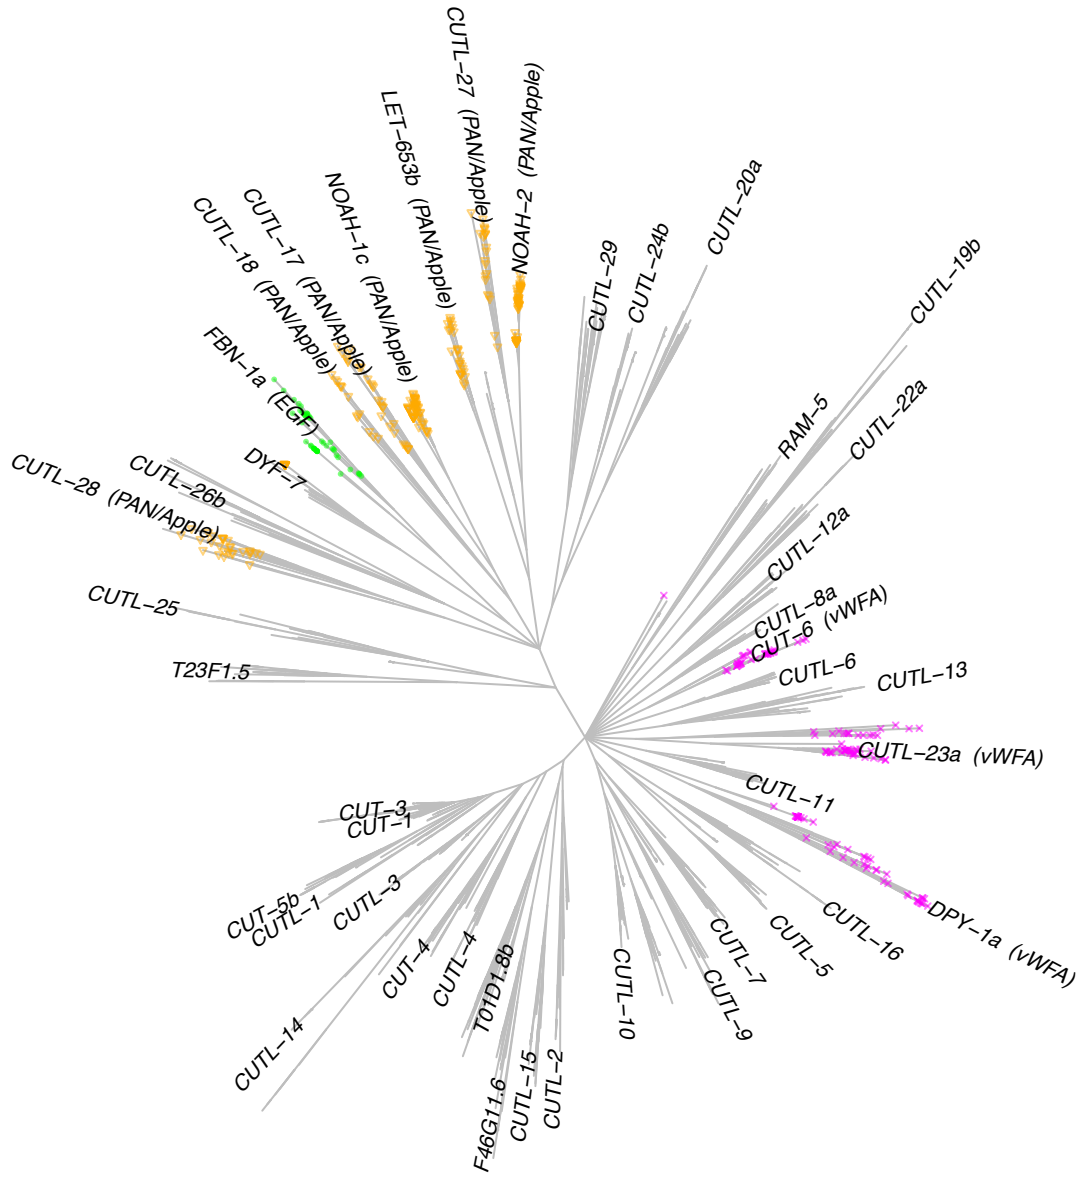

● EGF

× vWFA

▽ PAN/Apple

Supplementary Figure 8: Selective constraint profiles for standalone ZP-C proteins. Site-specific estimates of selective constraint (dN/dS) for (a) the T01D1.8 subfamily, (b) the F46G11.6 subfamily, and (c) the CUTL-19 subfamily. The y-axis shows posterior mean estimates of dN/dS ( $\pm$  standard errors) obtained using the M8 codon substitution model, while the x-axis shows sequence position (annotated with secondary structure predictions for the *C. elegans* member of the respective subfamily; obtained from RaptorX ss3 secondary structure predictions, given untrimmed sequences as input). Orange dashes indicate cysteine residues in the *C. elegans* sequence; selected cysteines are labelled, following Figure 1 of the main text. Gaps in the dN/dS plot reflect sequence regions that were trimmed during alignment.

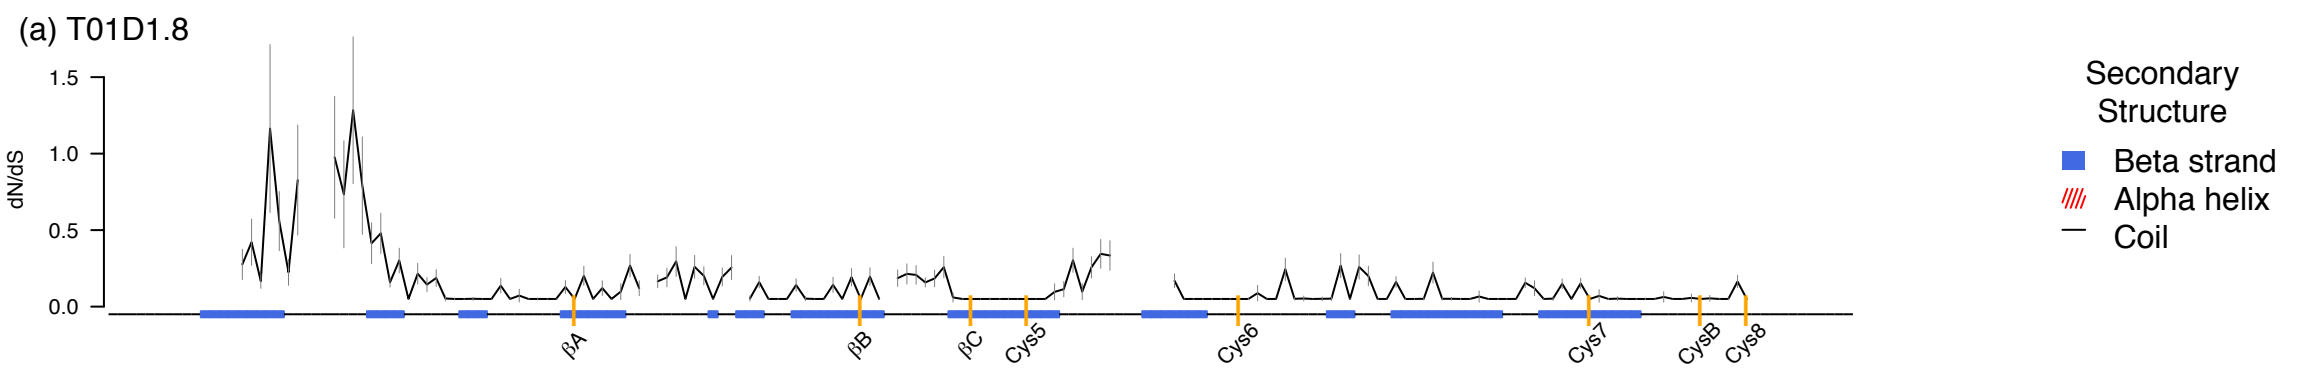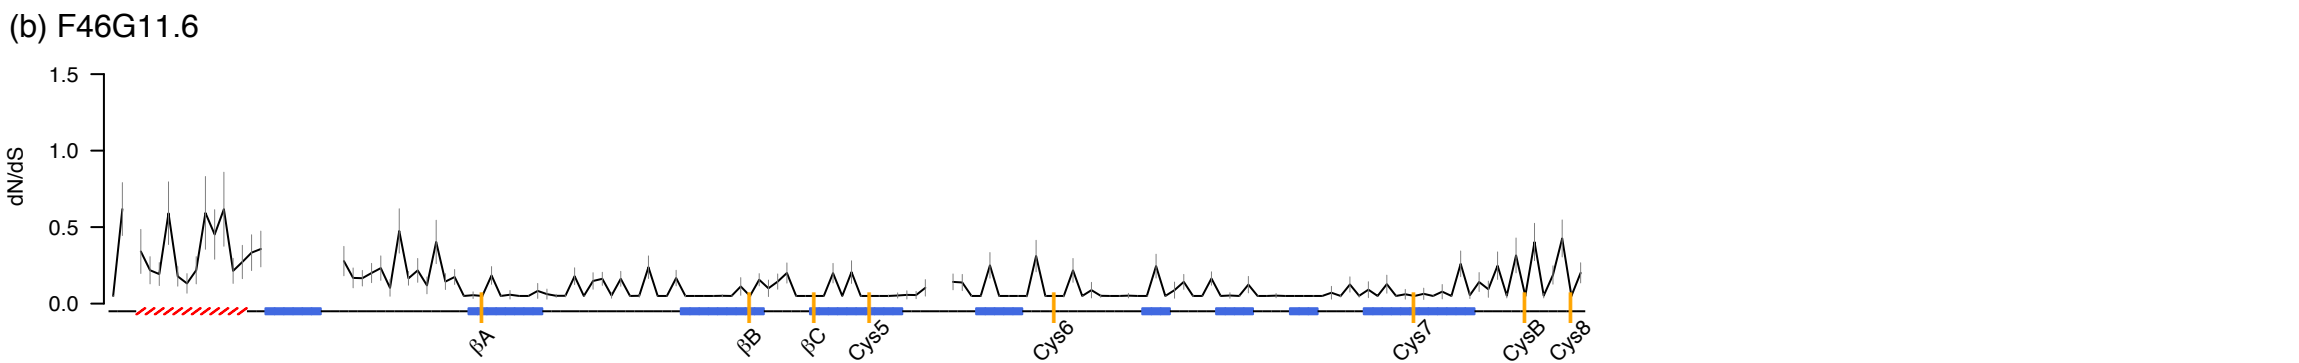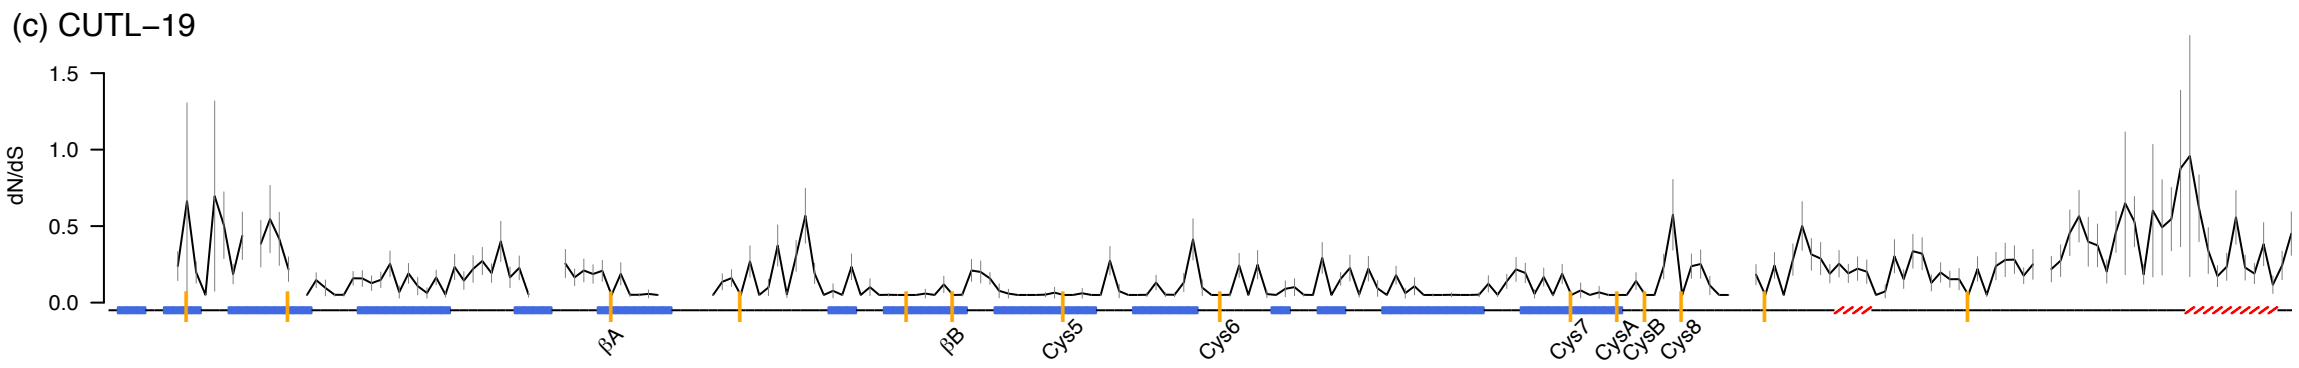

Supplementary Figure 9: Conserved disulfide connectivity patterns in nematode ZP-N domains. ZP-N domains from *C. elegans* ZP module homology models (pink lines) were aligned and superimposed on the template structure, human uromodulin (grey cartoon). Two orientations are shown. Cysteine residues in the *C. elegans* ZP-N domains are shown in stick format, and the two disulfide linkages typical of ZP-N domains (Cys1-Cys4 and Cys2-Cys3) are shown for the template as grey dot clouds. These disulfides were recovered in all models, with the exception of the three short ZPD proteins (which lack ZP-N domains) and CUTL-9 (which possesses a large insertion that disrupted homology modelling of the ZP-N domain; not shown). Additionally, a pair of cysteines that evolved within the CUTL-5 subfamily are well positioned to form a novel disulfide between  $\beta$ F (position 59) and  $\beta$ G (position 77).

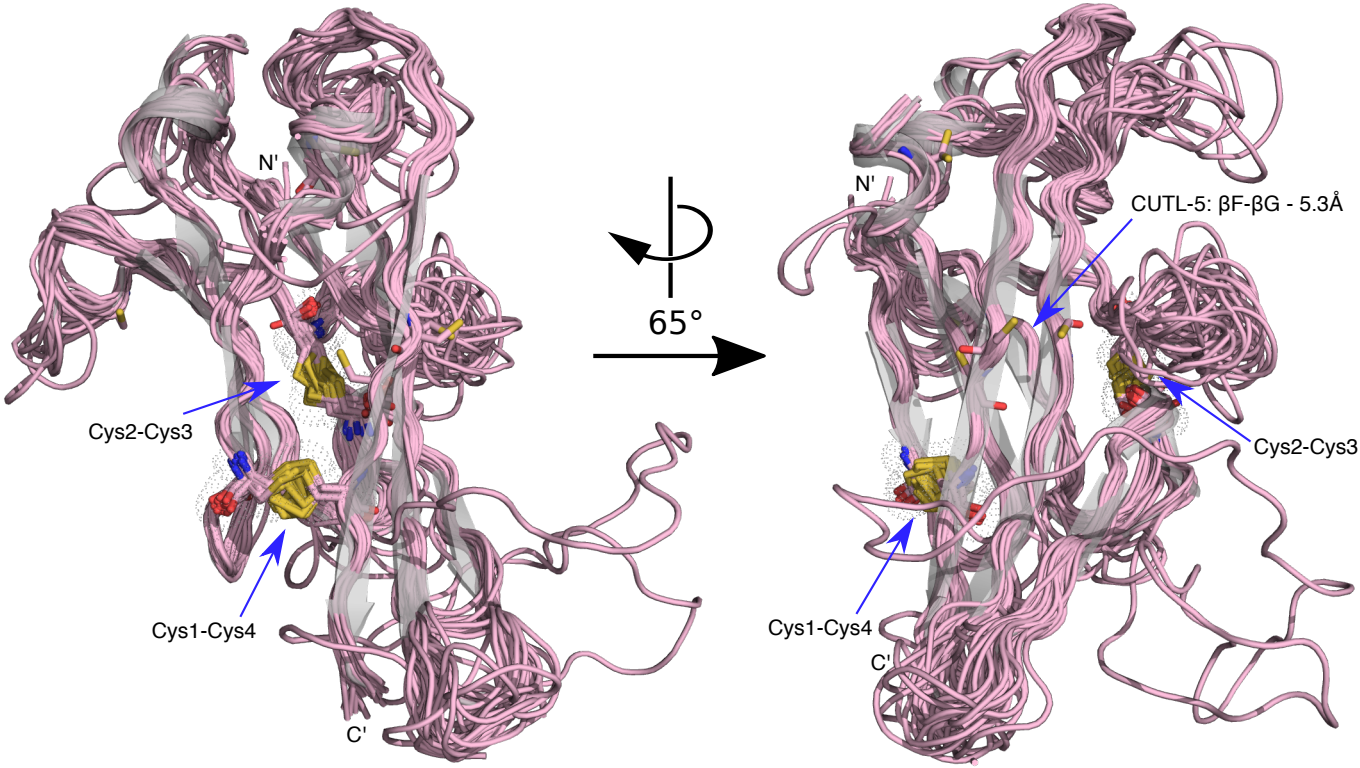

Supplementary Figure 10: Variable disulfide connectivity patterns in nematode ZP-C domains. ZP-C domains from *C. elegans* ZP module homology models (pink lines) were aligned and superimposed on the template structure, human uromodulin (grey cartoon). Two orientations are shown, and models are grouped by ZP-C domain type: (a) Type 1; (b) Type 2; (c) Type 3. Cysteine residues in the *C. elegans* ZP-C domains are shown in stick format, and the three disulfide linkages typical of ZP-C domains (Cys5-Cys7, Cys6-Cys8, and CysA-CysB) are shown for the template as grey dot clouds. C-terminal tails (mid-FG loop onward) were often quite long and disordered, if modelled at all, and were therefore removed for clarity. Four patterns are apparent:

1. The Cys5-Cys7 disulfide is conserved across all models, with the exception of CUTL-28b.
2. The Cys6-Cys8 disulfide appears to be broadly conserved but modelling and alignment uncertainty make this conclusion tentative for Type 1 domains; the expected Cys6-Cys8 linkage was supported for some Type 1 models but atypical Cys6-CysB and CysA-Cys8 linkages were observed for others. These binding patterns leave the expected partners unbound and distant from one another, suggesting that they may simply reflect modelling uncertainty in the largely disordered FG loop.
3. The CysA-CysB disulfide is conserved in Type 2 ZP-C domains, variable in Type 1 domains (recovered in two models, lost in one (CUTL-24b), but uncertain in most; see point 2, above), and modified in Type 3 domains, where CysA has been lost and replaced with a novel cysteine in the adjacent  $\beta$ C strand.
4. Cysteines in  $\beta$ A (position 105) and  $\beta$ B (position 134) define a novel disulfide specific to Type 2 and 3 ZP-C domains. A partially similar disulfide is inferred in FBN-1a (a Type 1 domain) between  $\beta$ A (position 105, again) and  $\beta$ F (position 203).

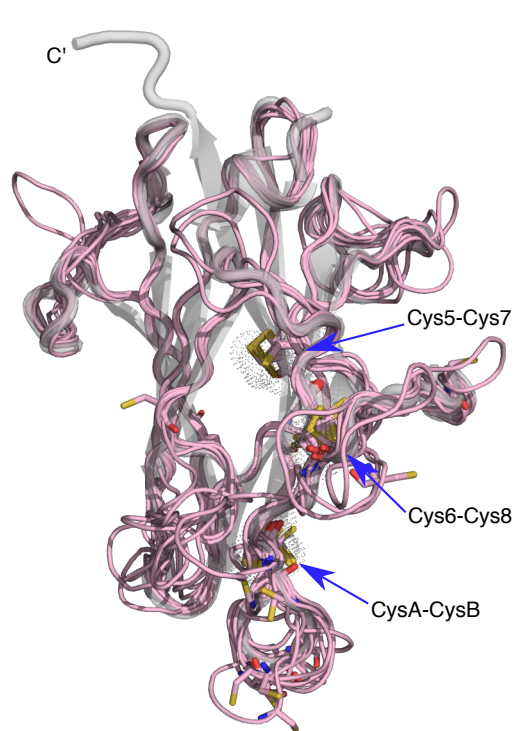

(a) Type 1

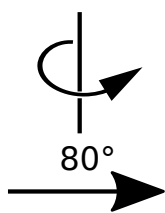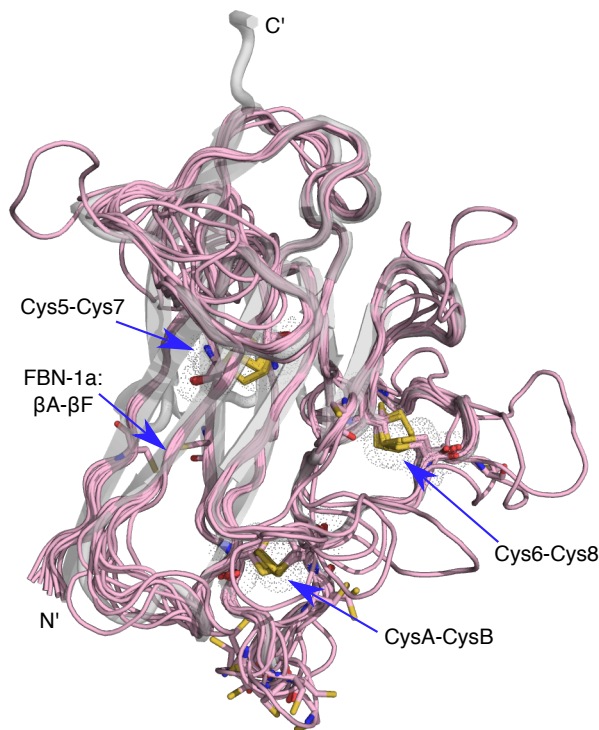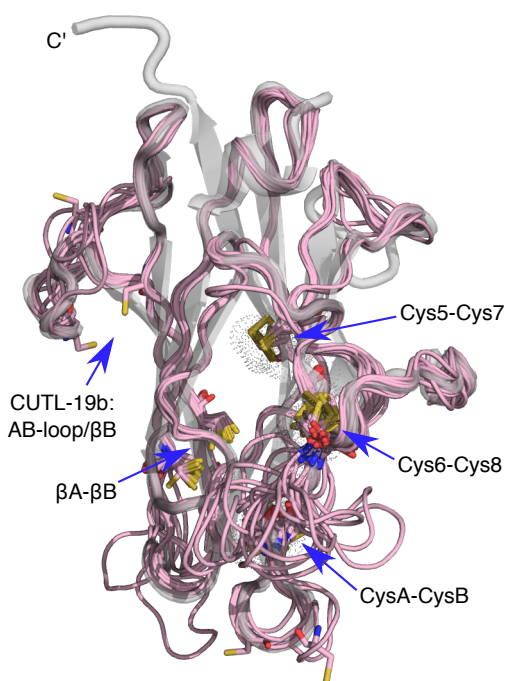

(b) Type 2

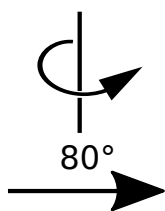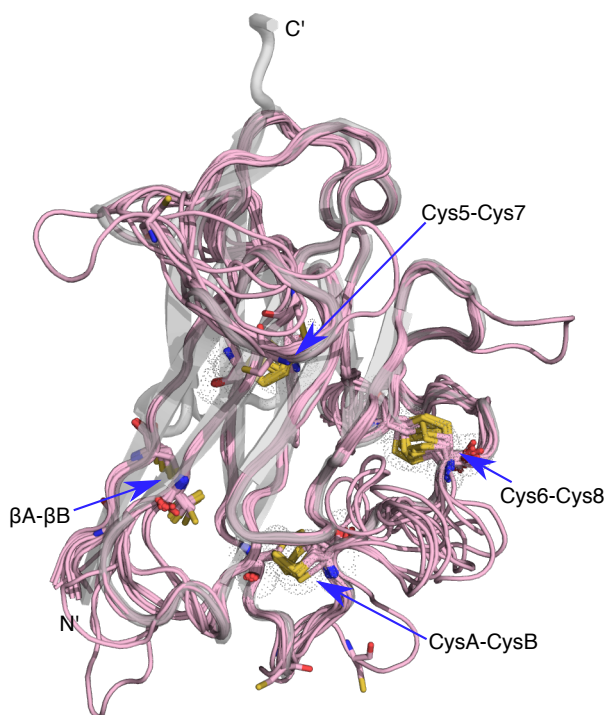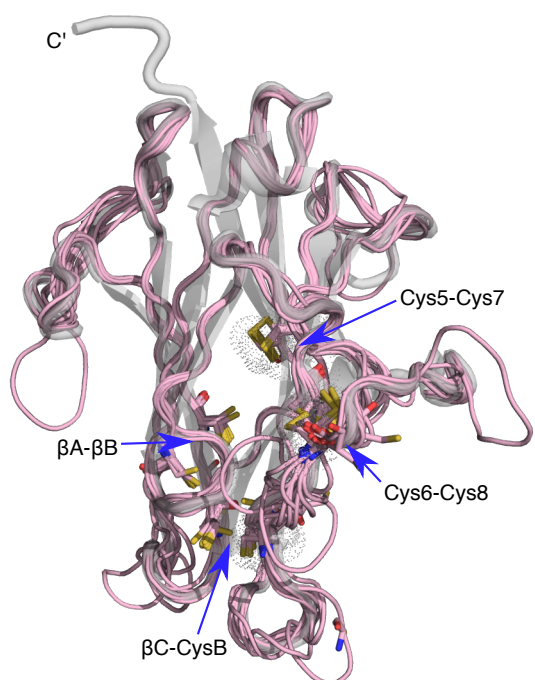

(c) Type 3

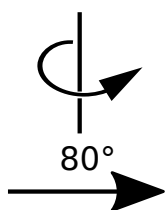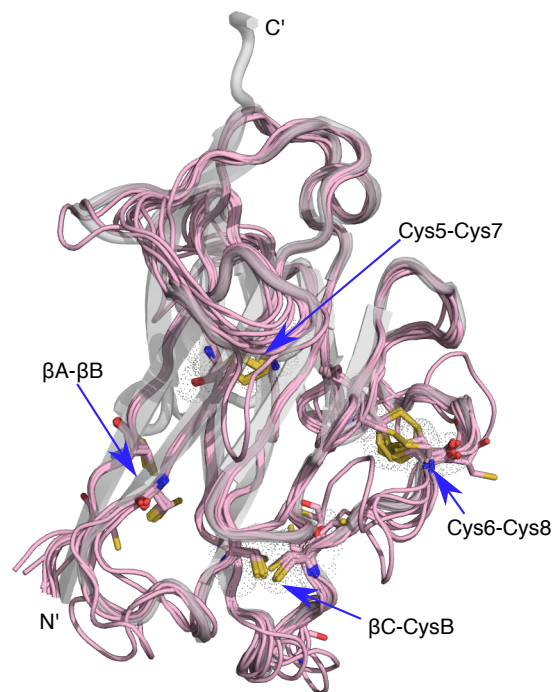

Supplement: evaa095_supplementary_data.pdf [file evaa095_supplementary_data.pdf]
